# Supplementary material for: Domain Wall Dynamics in a Ferroelastic Spin Crossover Complex with Giant Magnetoelectric Coupling
Source: PubMed Central journal article supplement (PMC8759087; doi:10.1021/jacs.1c08214), 2021-12-23
Supplement: ja1c08214_si_001.pdf [file ja1c08214_si_001.pdf]

Supporting Information for

# Domain Wall Dynamics in a Ferroelastic Spin Crossover Complex with Giant Magnetoelectric Coupling

Vibe Boel Jakobsen,<sup>†</sup> Elzbieta Trzop,<sup>‡</sup> Emiel Dobbelaar,<sup>†,#</sup> Laurence C. Gavin,<sup>†</sup> Shaline Chikara,<sup>§,¶</sup> Xiaxin Ding,<sup>||,□</sup> Minseong Lee,<sup>||</sup> Kane Esien,<sup>⊥</sup> Helge Müller-Bunz,<sup>†</sup> Solveig Felton,<sup>⊥</sup> Eric Collet,<sup>\*,‡</sup> Michael A. Carpenter,<sup>\*,∇</sup> Vivien S. Zapf,<sup>\*,||</sup> and Grace G. Morgan<sup>\*,†</sup>

<sup>†</sup> School of Chemistry, University College Dublin, Belfield, Dublin 4, Ireland

<sup>‡</sup> Univ Rennes, CNRS, IPR (Institut de Physique de Rennes) - UMR 6251, F-35000 Rennes, France

<sup>§</sup> Department of Physics, Auburn University Auburn, AL 36849, United States

<sup>||</sup> National High Magnetic Field Laboratory, Los Alamos National Laboratory, Los Alamos, New Mexico 87545, United States

<sup>⊥</sup> Centre for Nanostructured Media, School of Mathematics and Physics, Queen's University of Belfast, Belfast, BT7 1NN, Northern Ireland, United Kingdom

<sup>∇</sup> Department of Earth Sciences, University of Cambridge, Downing Street, Cambridge CB2 3EQ, England, United Kingdom

## Table of contents

|           |                                         |
|-----------|-----------------------------------------|
| <b>S1</b> | <b>Magnetometry measurements</b>        |
| <b>S2</b> | <b>Single crystal X-ray diffraction</b> |
| <b>S3</b> | <b>Resonant ultrasound spectroscopy</b> |
| <b>S4</b> | <b>Magnetoelectric coupling</b>         |
| <b>S5</b> | <b>References</b>                       |

## S1 Magnetometry measurements

**Table S1** Magnetic data for polycrystalline sample of complex **1** in cooling mode.

| Cooling mode            |                                                         |                         |                                                         |                         |                                                         |                         |                                                         |                         |                                                         |
|-------------------------|---------------------------------------------------------|-------------------------|---------------------------------------------------------|-------------------------|---------------------------------------------------------|-------------------------|---------------------------------------------------------|-------------------------|---------------------------------------------------------|
| Tempe-<br>rature<br>(K) | $\chi_M T$<br>(cm <sup>3</sup> K<br>mol <sup>-1</sup> ) | Tempe-<br>rature<br>(K) | $\chi_M T$<br>(cm <sup>3</sup> K<br>mol <sup>-1</sup> ) | Tempe-<br>rature<br>(K) | $\chi_M T$<br>(cm <sup>3</sup> K<br>mol <sup>-1</sup> ) | Tempe-<br>rature<br>(K) | $\chi_M T$<br>(cm <sup>3</sup> K<br>mol <sup>-1</sup> ) | Tempe-<br>rature<br>(K) | $\chi_M T$<br>(cm <sup>3</sup> K<br>mol <sup>-1</sup> ) |
| 350.045                 | 2.6348                                                  | 273.605                 | 2.6792                                                  | 197.614                 | 2.7462                                                  | 121.705                 | 2.3009                                                  | 46.011                  | 0.9935                                                  |
| 347.508                 | 2.6312                                                  | 271.603                 | 2.6797                                                  | 195.627                 | 2.7495                                                  | 119.710                 | 2.2886                                                  | 44.004                  | 0.9909                                                  |
| 345.550                 | 2.6057                                                  | 269.596                 | 2.6829                                                  | 193.623                 | 2.7512                                                  | 117.701                 | 2.2758                                                  | 41.998                  | 0.9874                                                  |
| 343.561                 | 2.6090                                                  | 267.583                 | 2.6841                                                  | 191.609                 | 2.7529                                                  | 115.708                 | 2.2638                                                  | 39.991                  | 0.9841                                                  |
| 341.565                 | 2.6111                                                  | 265.586                 | 2.6863                                                  | 189.623                 | 2.7550                                                  | 113.706                 | 2.2511                                                  | 37.990                  | 0.9802                                                  |
| 339.573                 | 2.6136                                                  | 263.614                 | 2.6881                                                  | 187.633                 | 2.7564                                                  | 111.721                 | 2.2394                                                  | 35.985                  | 0.9755                                                  |
| 337.577                 | 2.6158                                                  | 261.566                 | 2.6908                                                  | 185.631                 | 2.7590                                                  | 109.721                 | 2.2269                                                  | 33.985                  | 0.9704                                                  |
| 335.574                 | 2.6182                                                  | 259.583                 | 2.6929                                                  | 183.635                 | 2.7594                                                  | 107.727                 | 2.2150                                                  | 31.987                  | 0.9657                                                  |
| 333.616                 | 2.6210                                                  | 257.593                 | 2.6958                                                  | 181.633                 | 2.7625                                                  | 105.734                 | 2.2023                                                  | 29.983                  | 0.9583                                                  |
| 331.602                 | 2.6225                                                  | 255.591                 | 2.6974                                                  | 179.633                 | 2.7637                                                  | 103.734                 | 2.1899                                                  | 27.985                  | 0.9487                                                  |
| 329.582                 | 2.6248                                                  | 253.597                 | 2.6988                                                  | 177.637                 | 2.7656                                                  | 101.737                 | 2.1781                                                  | 25.986                  | 0.9373                                                  |
| 327.623                 | 2.6277                                                  | 251.599                 | 2.7013                                                  | 175.640                 | 2.7682                                                  | 99.748                  | 2.1665                                                  | 23.991                  | 0.9229                                                  |
| 325.601                 | 2.6300                                                  | 249.585                 | 2.7023                                                  | 173.634                 | 2.7695                                                  | 97.743                  | 2.1551                                                  | 22.078                  | 0.9052                                                  |
| 323.602                 | 2.6304                                                  | 247.599                 | 2.7040                                                  | 171.634                 | 2.7714                                                  | 95.777                  | 2.1440                                                  | 20.057                  | 0.8822                                                  |
| 321.593                 | 2.6334                                                  | 245.593                 | 2.7066                                                  | 169.640                 | 2.7722                                                  | 93.777                  | 2.1322                                                  | 18.040                  | 0.8522                                                  |
| 319.615                 | 2.6362                                                  | 243.588                 | 2.7072                                                  | 167.646                 | 2.7742                                                  | 91.768                  | 2.1219                                                  | 16.029                  | 0.8139                                                  |
| 317.608                 | 2.6377                                                  | 241.615                 | 2.7104                                                  | 165.647                 | 2.7753                                                  | 89.767                  | 2.1108                                                  | 14.022                  | 0.7643                                                  |
| 315.603                 | 2.6395                                                  | 239.595                 | 2.7119                                                  | 163.651                 | 2.7770                                                  | 87.809                  | 2.1003                                                  | 12.014                  | 0.6989                                                  |
| 313.597                 | 2.6423                                                  | 237.589                 | 2.7134                                                  | 161.644                 | 2.7777                                                  | 85.829                  | 2.0891                                                  | 10.010                  | 0.6172                                                  |
| 311.600                 | 2.6439                                                  | 235.600                 | 2.7155                                                  | 159.661                 | 2.7790                                                  | 83.830                  | 2.0656                                                  | 8.010                   | 0.5161                                                  |
| 309.612                 | 2.6444                                                  | 233.599                 | 2.7174                                                  | 157.653                 | 2.7789                                                  | 82.063                  | 1.5338                                                  | 6.009                   | 0.3976                                                  |
| 307.586                 | 2.6472                                                  | 231.596                 | 2.7194                                                  | 155.654                 | 2.7808                                                  | 80.054                  | 1.1661                                                  | 3.995                   | 0.2697                                                  |
| 305.610                 | 2.6487                                                  | 229.590                 | 2.7206                                                  | 153.653                 | 2.7811                                                  | 78.058                  | 1.1211                                                  |                         |                                                         |
| 303.605                 | 2.6502                                                  | 227.609                 | 2.7213                                                  | 151.659                 | 2.7825                                                  | 76.062                  | 1.1000                                                  |                         |                                                         |
| 301.612                 | 2.6524                                                  | 225.591                 | 2.7234                                                  | 149.662                 | 2.7832                                                  | 74.062                  | 1.0828                                                  |                         |                                                         |
| 299.594                 | 2.6541                                                  | 223.594                 | 2.7252                                                  | 147.669                 | 2.7843                                                  | 72.062                  | 1.0686                                                  |                         |                                                         |
| 297.597                 | 2.6555                                                  | 221.602                 | 2.7266                                                  | 145.663                 | 2.7854                                                  | 70.060                  | 1.0563                                                  |                         |                                                         |
| 295.609                 | 2.6580                                                  | 219.614                 | 2.7280                                                  | 143.657                 | 2.7856                                                  | 68.064                  | 1.0462                                                  |                         |                                                         |
| 293.605                 | 2.6595                                                  | 217.605                 | 2.7289                                                  | 141.671                 | 2.7869                                                  | 66.085                  | 1.0389                                                  |                         |                                                         |
| 291.593                 | 2.6610                                                  | 215.602                 | 2.7303                                                  | 139.675                 | 2.7839                                                  | 64.071                  | 1.0314                                                  |                         |                                                         |
| 289.575                 | 2.6631                                                  | 213.602                 | 2.7319                                                  | 137.680                 | 2.4306                                                  | 62.071                  | 1.0250                                                  |                         |                                                         |
| 287.611                 | 2.6646                                                  | 211.596                 | 2.7334                                                  | 135.669                 | 2.3857                                                  | 60.081                  | 1.0198                                                  |                         |                                                         |
| 285.613                 | 2.6667                                                  | 209.607                 | 2.7348                                                  | 133.688                 | 2.3732                                                  | 58.091                  | 1.0148                                                  |                         |                                                         |
| 283.603                 | 2.6684                                                  | 207.611                 | 2.7361                                                  | 131.679                 | 2.3609                                                  | 56.073                  | 1.0104                                                  |                         |                                                         |
| 281.613                 | 2.6711                                                  | 205.612                 | 2.7387                                                  | 129.694                 | 2.3485                                                  | 54.074                  | 1.0063                                                  |                         |                                                         |
| 279.602                 | 2.6733                                                  | 203.616                 | 2.7392                                                  | 127.690                 | 2.3359                                                  | 52.057                  | 1.0028                                                  |                         |                                                         |
| 277.594                 | 2.6743                                                  | 201.618                 | 2.7428                                                  | 125.691                 | 2.3239                                                  | 50.040                  | 0.9997                                                  |                         |                                                         |
| 275.595                 | 2.6772                                                  | 199.608                 | 2.7456                                                  | 123.699                 | 2.3134                                                  | 48.015                  | 0.9968                                                  |                         |                                                         |

**Table S2** Magnetic data for polycrystalline sample of complex **1** in warming mode.

| Warming mode    |                                                   |                 |                                                   |                 |                                                   |                 |                                                   |                 |                                                   |
|-----------------|---------------------------------------------------|-----------------|---------------------------------------------------|-----------------|---------------------------------------------------|-----------------|---------------------------------------------------|-----------------|---------------------------------------------------|
| Temperature (K) | $\chi_M T$ (cm <sup>3</sup> K mol <sup>-1</sup> ) | Temperature (K) | $\chi_M T$ (cm <sup>3</sup> K mol <sup>-1</sup> ) | Temperature (K) | $\chi_M T$ (cm <sup>3</sup> K mol <sup>-1</sup> ) | Temperature (K) | $\chi_M T$ (cm <sup>3</sup> K mol <sup>-1</sup> ) | Temperature (K) | $\chi_M T$ (cm <sup>3</sup> K mol <sup>-1</sup> ) |
| 3.997           | 0.2698                                            | 80.124          | 1.1388                                            | 156.246         | 2.7953                                            | 232.308         | 2.7220                                            | 308.351         | 2.6449                                            |
| 6.003           | 0.3973                                            | 82.120          | 1.1693                                            | 158.258         | 2.7939                                            | 234.303         | 2.7215                                            | 310.343         | 2.6431                                            |
| 8.004           | 0.5159                                            | 84.129          | 1.2229                                            | 160.265         | 2.7932                                            | 236.305         | 2.7202                                            | 312.353         | 2.6409                                            |
| 10.001          | 0.6175                                            | 86.134          | 1.3806                                            | 162.261         | 2.7930                                            | 238.307         | 2.7180                                            | 314.368         | 2.6407                                            |
| 11.998          | 0.6986                                            | 88.152          | 1.8192                                            | 164.257         | 2.7920                                            | 240.315         | 2.7162                                            | 316.347         | 2.6381                                            |
| 14.008          | 0.7636                                            | 90.148          | 2.0491                                            | 166.265         | 2.7904                                            | 242.320         | 2.7134                                            | 318.367         | 2.6363                                            |
| 15.989          | 0.8130                                            | 92.157          | 2.1065                                            | 168.267         | 2.7896                                            | 244.320         | 2.7120                                            | 320.355         | 2.6333                                            |
| 17.989          | 0.8510                                            | 94.167          | 2.1311                                            | 170.266         | 2.7883                                            | 246.317         | 2.7094                                            | 322.344         | 2.6320                                            |
| 20.009          | 0.8812                                            | 96.166          | 2.1460                                            | 172.271         | 2.7876                                            | 248.308         | 2.7078                                            | 324.349         | 2.6296                                            |
| 21.994          | 0.9043                                            | 98.161          | 2.1583                                            | 174.279         | 2.7853                                            | 250.321         | 2.7053                                            | 326.345         | 2.6275                                            |
| 23.995          | 0.9225                                            | 100.173         | 2.1708                                            | 176.276         | 2.7841                                            | 252.316         | 2.7027                                            | 328.345         | 2.6249                                            |
| 26.000          | 0.9370                                            | 102.181         | 2.1832                                            | 178.278         | 2.7822                                            | 254.323         | 2.7000                                            | 330.337         | 2.6228                                            |
| 28.000          | 0.9486                                            | 104.180         | 2.1957                                            | 180.275         | 2.7813                                            | 256.326         | 2.6976                                            | 332.341         | 2.6225                                            |
| 29.999          | 0.9577                                            | 106.192         | 2.2090                                            | 182.276         | 2.7786                                            | 258.326         | 2.6955                                            | 334.324         | 2.6210                                            |
| 32.000          | 0.9653                                            | 108.183         | 2.2208                                            | 184.275         | 2.7766                                            | 260.320         | 2.6941                                            | 336.339         | 2.6174                                            |
| 34.000          | 0.9715                                            | 110.194         | 2.2335                                            | 186.281         | 2.7747                                            | 262.323         | 2.6924                                            | 338.346         | 2.6166                                            |
| 36.001          | 0.9767                                            | 112.189         | 2.2466                                            | 188.285         | 2.7726                                            | 264.351         | 2.6900                                            | 340.342         | 2.6145                                            |
| 38.002          | 0.9811                                            | 114.205         | 2.2588                                            | 190.285         | 2.7694                                            | 266.333         | 2.6872                                            | 342.356         | 2.6133                                            |
| 40.005          | 0.9851                                            | 116.193         | 2.2714                                            | 192.288         | 2.7679                                            | 268.323         | 2.6854                                            | 344.347         | 2.6110                                            |
| 42.007          | 0.9884                                            | 118.198         | 2.2838                                            | 194.293         | 2.7665                                            | 270.322         | 2.6826                                            | 346.333         | 2.6100                                            |
| 44.008          | 0.9916                                            | 120.191         | 2.2964                                            | 196.292         | 2.7645                                            | 272.325         | 2.6812                                            | 348.342         | 2.6087                                            |
| 46.012          | 0.9948                                            | 122.240         | 2.3097                                            | 198.279         | 2.7622                                            | 274.326         | 2.6797                                            | 350.334         | 2.6074                                            |
| 48.016          | 0.9976                                            | 124.238         | 2.3222                                            | 200.292         | 2.7600                                            | 276.331         | 2.6766                                            |                 |                                                   |
| 50.030          | 1.0005                                            | 126.211         | 2.3339                                            | 202.293         | 2.7589                                            | 278.319         | 2.6750                                            |                 |                                                   |
| 52.036          | 1.0034                                            | 128.200         | 2.3452                                            | 204.306         | 2.7561                                            | 280.334         | 2.6740                                            |                 |                                                   |
| 54.047          | 1.0066                                            | 130.202         | 2.3573                                            | 206.292         | 2.7548                                            | 282.349         | 2.6714                                            |                 |                                                   |
| 56.052          | 1.0100                                            | 132.210         | 2.3689                                            | 208.297         | 2.7521                                            | 284.326         | 2.6676                                            |                 |                                                   |
| 58.055          | 1.0144                                            | 134.210         | 2.3817                                            | 210.299         | 2.7498                                            | 286.325         | 2.6658                                            |                 |                                                   |
| 60.061          | 1.0185                                            | 136.204         | 2.3928                                            | 212.305         | 2.7481                                            | 288.329         | 2.6647                                            |                 |                                                   |
| 62.066          | 1.0239                                            | 138.237         | 2.4070                                            | 214.303         | 2.7466                                            | 290.338         | 2.6619                                            |                 |                                                   |
| 64.075          | 1.0300                                            | 140.227         | 2.5091                                            | 216.297         | 2.7437                                            | 292.325         | 2.6611                                            |                 |                                                   |
| 66.081          | 1.0373                                            | 142.227         | 2.8015                                            | 218.303         | 2.7423                                            | 294.329         | 2.6590                                            |                 |                                                   |
| 68.080          | 1.0455                                            | 144.235         | 2.7999                                            | 220.310         | 2.7394                                            | 296.333         | 2.6570                                            |                 |                                                   |
| 70.094          | 1.0555                                            | 146.235         | 2.7976                                            | 222.304         | 2.7370                                            | 298.335         | 2.6557                                            |                 |                                                   |
| 72.094          | 1.0671                                            | 148.254         | 2.7985                                            | 224.305         | 2.7352                                            | 300.343         | 2.6543                                            |                 |                                                   |
| 74.107          | 1.0811                                            | 150.255         | 2.7973                                            | 226.313         | 2.7355                                            | 302.334         | 2.6527                                            |                 |                                                   |
| 76.103          | 1.0966                                            | 152.266         | 2.7966                                            | 228.306         | 2.7318                                            | 304.330         | 2.6496                                            |                 |                                                   |
| 78.106          | 1.1160                                            | 154.216         | 2.7948                                            | 230.318         | 2.7290                                            | 306.345         | 2.6473                                            |                 |                                                   |

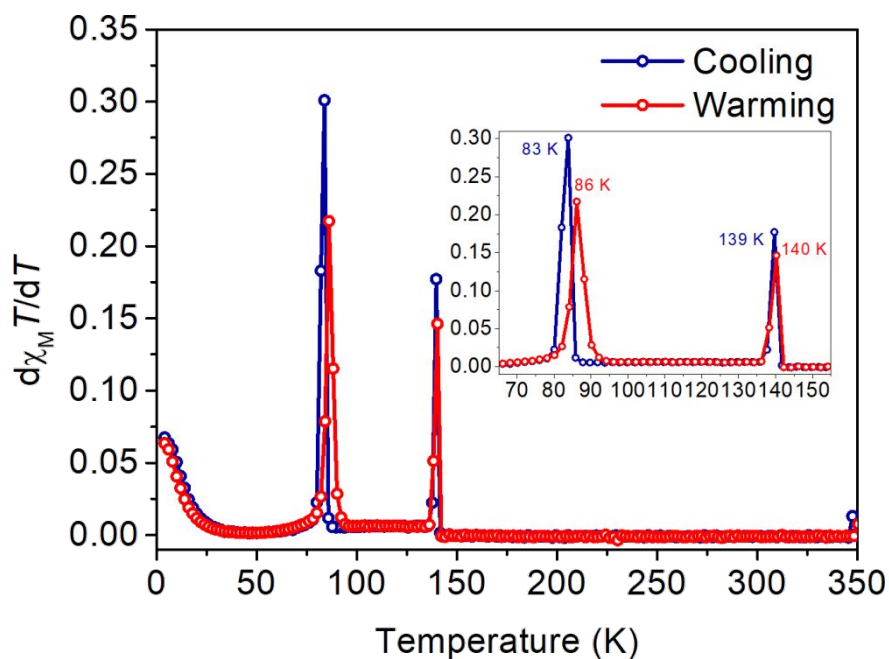

**Figure S1** Derivative of  $\chi_M T$  versus temperature,  $T$  for complex **1** showing discontinuities. The inset shows  $d\chi_M T/T$  maximum values at 83 K (cooling) and 86 K (heating) in the lower hysteresis region and 139 K (cooling) and 140 K (heating) in the upper hysteresis window.

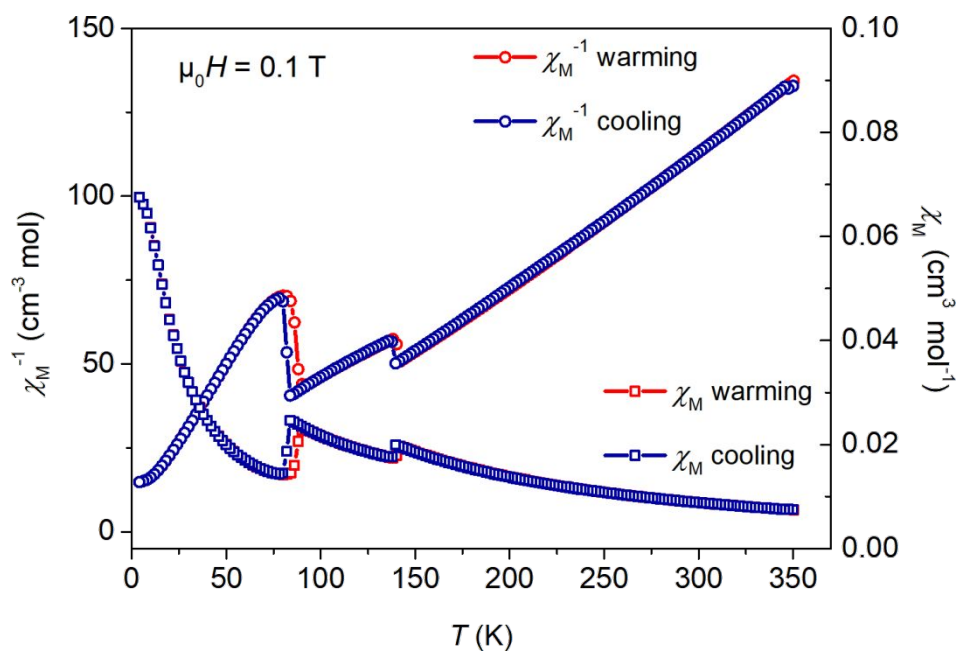

**Figure S2** Temperature dependence of  $\chi_M^{-1}$  (left axis) and  $\chi_M$  (right axis) in warming and cooling modes for complex **1**.

## S2 Single crystal X-ray diffraction

### S2.1 Crystal and structure refinement data

**Table S3** Crystallographic data for complex **1** at 10 K, 82 K, 115 K, 150 K and 250 K.

|                                               | <b>1, 10 K</b>                                                                                                                                      | <b>1, 82 K</b>                                                                                                                                      | <b>1, 115 K</b>                                                                                                                                     | <b>1, 150 K</b>                                                                                                                                     | <b>1, 250 K</b>                                                                                                                                     |
|-----------------------------------------------|-----------------------------------------------------------------------------------------------------------------------------------------------------|-----------------------------------------------------------------------------------------------------------------------------------------------------|-----------------------------------------------------------------------------------------------------------------------------------------------------|-----------------------------------------------------------------------------------------------------------------------------------------------------|-----------------------------------------------------------------------------------------------------------------------------------------------------|
| CCDC number                                   | 2100801                                                                                                                                             | 2100800                                                                                                                                             | 2100799                                                                                                                                             | 2100798                                                                                                                                             | 2100797                                                                                                                                             |
| Empirical formula                             | C <sub>46</sub> H <sub>44</sub> BCl <sub>4</sub> MnN <sub>4</sub> O <sub>2</sub>                                                                    | C <sub>46</sub> H <sub>44</sub> BCl <sub>4</sub> MnN <sub>4</sub> O <sub>2</sub>                                                                    | C <sub>46</sub> H <sub>44</sub> BCl <sub>4</sub> MnN <sub>4</sub> O <sub>2</sub>                                                                    | C <sub>46</sub> H <sub>44</sub> BCl <sub>4</sub> MnN <sub>4</sub> O <sub>2</sub>                                                                    | C <sub>46</sub> H <sub>44</sub> BCl <sub>4</sub> MnN <sub>4</sub> O <sub>2</sub>                                                                    |
| Molecular formula                             | [C <sub>22</sub> H <sub>24</sub> N <sub>4</sub> O <sub>2</sub> MnCl <sub>4</sub> ] <sup>+</sup><br>[C <sub>24</sub> H <sub>20</sub> B] <sup>-</sup> | [C <sub>22</sub> H <sub>24</sub> N <sub>4</sub> O <sub>2</sub> MnCl <sub>4</sub> ] <sup>+</sup><br>[C <sub>24</sub> H <sub>20</sub> B] <sup>-</sup> | [C <sub>22</sub> H <sub>24</sub> N <sub>4</sub> O <sub>2</sub> MnCl <sub>4</sub> ] <sup>+</sup><br>[C <sub>24</sub> H <sub>20</sub> B] <sup>-</sup> | [C <sub>22</sub> H <sub>24</sub> N <sub>4</sub> O <sub>2</sub> MnCl <sub>4</sub> ] <sup>+</sup><br>[C <sub>24</sub> H <sub>20</sub> B] <sup>-</sup> | [C <sub>22</sub> H <sub>24</sub> N <sub>4</sub> O <sub>2</sub> MnCl <sub>4</sub> ] <sup>+</sup><br>[C <sub>24</sub> H <sub>20</sub> B] <sup>-</sup> |
| Formula weight                                | 892.40                                                                                                                                              | 892.40                                                                                                                                              | 892.40                                                                                                                                              | 892.40                                                                                                                                              | 892.40                                                                                                                                              |
| Wavelength                                    | 0.71073                                                                                                                                             | 0.71073                                                                                                                                             | 0.71073                                                                                                                                             | 0.71073                                                                                                                                             | 0.71073                                                                                                                                             |
| Crystal system                                | Triclinic                                                                                                                                           | Triclinic                                                                                                                                           | Triclinic                                                                                                                                           | Monoclinic                                                                                                                                          | Monoclinic                                                                                                                                          |
| Space group                                   | P1                                                                                                                                                  | P1                                                                                                                                                  | P1                                                                                                                                                  | Pc                                                                                                                                                  | Cc                                                                                                                                                  |
| a (Å)                                         | 14.2889(4)                                                                                                                                          | 14.4026(7)                                                                                                                                          | 14.2241(4)                                                                                                                                          | 14.7537(3)                                                                                                                                          | 14.8473(5)                                                                                                                                          |
| b (Å)                                         | 13.2527(7)                                                                                                                                          | 13.3973(7)                                                                                                                                          | 22.9492(6)                                                                                                                                          | 22.6797(3)                                                                                                                                          | 22.6658(5)                                                                                                                                          |
| c (Å)                                         | 13.8907(8)                                                                                                                                          | 13.9646(7)                                                                                                                                          | 13.4248(4)                                                                                                                                          | 14.2596(3)                                                                                                                                          | 14.4182(5)                                                                                                                                          |
| α (°)                                         | 117.134(6)                                                                                                                                          | 117.044(5)                                                                                                                                          | 94.753(2)                                                                                                                                           | 90                                                                                                                                                  | 90                                                                                                                                                  |
| β (°)                                         | 104.637(4)                                                                                                                                          | 104.573(4)                                                                                                                                          | 103.722(2)                                                                                                                                          | 117.133(3)                                                                                                                                          | 117.027(4)                                                                                                                                          |
| γ (°)                                         | 104.078(4)                                                                                                                                          | 104.062(4)                                                                                                                                          | 80.125(2)                                                                                                                                           | 90                                                                                                                                                  | 90                                                                                                                                                  |
| Volume (Å <sup>3</sup> )                      | 2059.3(2)                                                                                                                                           | 2113.7(2)                                                                                                                                           | 4190.1(2)                                                                                                                                           | 4246.30(17)                                                                                                                                         | 4322.2(3)                                                                                                                                           |
| Z                                             | 2                                                                                                                                                   | 2                                                                                                                                                   | 4                                                                                                                                                   | 4                                                                                                                                                   | 4                                                                                                                                                   |
| Density (calculated)<br>(mg/m <sup>3</sup> )  | 1.439                                                                                                                                               | 1.402                                                                                                                                               | 1.415                                                                                                                                               | 1.396                                                                                                                                               | 1.371                                                                                                                                               |
| Absorption coefficient<br>(mm <sup>-1</sup> ) | 0.625                                                                                                                                               | 0.609                                                                                                                                               | 0.615                                                                                                                                               | 0.607                                                                                                                                               | 0.596                                                                                                                                               |
| Crystal size (mm <sup>3</sup> )               | 0.243 × 0.151 × 0.124                                                                                                                               | 0.298 × 0.258 × 0.133                                                                                                                               | 0.328 × 0.235 × 0.132                                                                                                                               | 0.334 × 0.181 × 0.152                                                                                                                               | 0.334 × 0.181 × 0.152                                                                                                                               |
| Goodness-of-fit on F <sup>2</sup>             | 1.004                                                                                                                                               | 0.942                                                                                                                                               | 0.800                                                                                                                                               | 1.014                                                                                                                                               | 1.032                                                                                                                                               |
| Final R indices [I>2σ(I)]                     | R <sub>1</sub> = 0.0637, wR <sub>2</sub> =<br>0.1462                                                                                                | R <sub>1</sub> = 0.0529, wR <sub>2</sub> =<br>0.1145                                                                                                | R <sub>1</sub> = 0.0389, wR <sub>2</sub> =<br>0.0692                                                                                                | R <sub>1</sub> = 0.0379, wR <sub>2</sub> =<br>0.0746                                                                                                | R <sub>1</sub> = 0.0388, wR <sub>2</sub> =<br>0.0781                                                                                                |
| Absolute structure<br>parameter               | -0.16(3)                                                                                                                                            | 0.042(17)                                                                                                                                           | 0.023(10)                                                                                                                                           | -0.007(6)                                                                                                                                           | 0.008(9)                                                                                                                                            |

**Table S4** Selected bond lengths (Å) and angles (°) for complex **1**.

|                          | <b>1</b> (10 K) | <b>1</b> (82 K) | <b>1</b> (115 K) | <b>1</b> (150 K) | <b>1</b> (250 K) |
|--------------------------|-----------------|-----------------|------------------|------------------|------------------|
| <b>Bond lengths (Å)</b>  |                 |                 |                  |                  |                  |
| Mn1-O1 <sub>phen</sub>   | 1.864(10)       | 1.883(5)        | 1.871(4)         | 1.871(2)         | 1.869(3)         |
| Mn1-O2 <sub>phen</sub>   | 1.883(10)       | 1.897(5)        | 1.881(4)         | 1.872(2)         | 1.872(3)         |
| Mn1-N1 <sub>imine</sub>  | 2.001(12)       | 2.011(6)        | 2.017(5)         | 2.125(3)         | 2.115(3)         |
| Mn1-N2 <sub>amine</sub>  | 2.067(11)       | 2.102(6)        | 2.120(5)         | 2.217(3)         | 2.225(3)         |
| Mn1-N3 <sub>amine</sub>  | 2.040(12)       | 2.072(6)        | 2.073(5)         | 2.240(3)         | 2.216(3)         |
| Mn1-N4 <sub>imine</sub>  | 1.967(11)       | 2.007(7)        | 2.013(6)         | 2.079(3)         | 2.088(3)         |
| Mn2-O3 <sub>phen</sub>   | 1.876(10)       | 1.880(5)        | 1.874(4)         | 1.866(2)         |                  |
| Mn2-O4 <sub>phen</sub>   | 1.877(10)       | 1.902(5)        | 1.880(4)         | 1.875(2)         |                  |
| Mn2-N5 <sub>imine</sub>  | 1.987(12)       | 2.001(7)        | 2.034(5)         | 2.107(3)         |                  |
| Mn2-N6 <sub>amine</sub>  | 2.042(12)       | 2.068(6)        | 2.141(6)         | 2.234(3)         |                  |
| Mn2-N7 <sub>amine</sub>  | 2.089(11)       | 2.096(6)        | 2.107(6)         | 2.204(3)         |                  |
| Mn2-N8 <sub>imine</sub>  | 1.999(12)       | 2.020(6)        | 2.027(6)         | 2.090(3)         |                  |
| Mn3-O5 <sub>phen</sub>   |                 |                 | 1.864(4)         |                  |                  |
| Mn3-O6 <sub>phen</sub>   |                 |                 | 1.875(4)         |                  |                  |
| Mn3-N9 <sub>imine</sub>  |                 |                 | 2.106(5)         |                  |                  |
| Mn3-N10 <sub>amine</sub> |                 |                 | 2.242(5)         |                  |                  |
| Mn3-N11 <sub>amine</sub> |                 |                 | 2.206(5)         |                  |                  |
| Mn3-N12 <sub>imine</sub> |                 |                 | 2.081(5)         |                  |                  |
| Mn4-O7 <sub>phen</sub>   |                 |                 | 1.864(4)         |                  |                  |
| Mn4-O8 <sub>phen</sub>   |                 |                 | 1.876(4)         |                  |                  |
| Mn4-N13 <sub>imine</sub> |                 |                 | 2.101(6)         |                  |                  |
| Mn4-N14 <sub>amine</sub> |                 |                 | 2.239(7)         |                  |                  |
| Mn4-N15 <sub>amine</sub> |                 |                 | 2.229(7)         |                  |                  |
| Mn4-N16 <sub>imine</sub> |                 |                 | 2.091(5)         |                  |                  |
| <b>Bond angles (°)</b>   |                 |                 |                  |                  |                  |
| O1-Mn1-O2                | 176.0(4)        | 176.0(2)        | 176.74(19)       | 177.03(11)       | 176.74(13)       |
| O1-Mn1-N1                | 89.7(4)         | 89.7(2)         | 89.1(2)          | 87.36(11)        | 87.52(12)        |
| O1-Mn1-N2                | 94.1(4)         | 93.4(2)         | 93.0(2)          | 93.84(12)        | 93.57(13)        |
| O1-Mn1-N3                | 85.0(4)         | 85.2(2)         | 85.2(2)          | 85.03(12)        | 85.97(13)        |
| O1-Mn1-N4                | 89.4(4)         | 89.7(2)         | 90.4(2)          | 90.04(11)        | 90.15(12)        |
| O2-Mn1-N1                | 94.1(4)         | 94.1(2)         | 94.01(19)        | 92.78(11)        | 92.96(12)        |
| O2-Mn1-N2                | 87.5(4)         | 88.2(2)         | 88.17(19)        | 89.12(11)        | 89.68(13)        |
| O2-Mn1-N3                | 91.5(4)         | 91.3(2)         | 91.9(2)          | 95.81(12)        | 94.58(14)        |
| O2-Mn1-N4                | 88.6(4)         | 88.3(2)         | 88.0(2)          | 87.18(11)        | 86.67(12)        |
| N1-Mn1-N2                | 86.7(4)         | 86.1(2)         | 85.6(2)          | 82.05(13)        | 82.74(14)        |
| N1-Mn1-N3                | 169.8(5)        | 168.7(3)        | 167.6(2)         | 159.22(12)       | 160.58(13)       |
| N2-Mn1-N3                | 85.1(4)         | 84.2(3)         | 83.7(2)          | 79.21(14)        | 79.43(16)        |
| N4-Mn1-N1                | 98.8(5)         | 100.2(3)        | 102.8(2)         | 113.27(12)       | 111.50(12)       |

|             |          |          |           |            |            |
|-------------|----------|----------|-----------|------------|------------|
| N4-Mn1-N2   | 173.5(5) | 173.0(2) | 171.0(2)  | 164.39(13) | 165.45(13) |
| N4-Mn1-N3   | 89.8(5)  | 89.8(3)  | 88.2(2)   | 86.08(12)  | 86.81(14)  |
| O3-Mn2-O4   | 174.8(5) | 175.8(2) | 176.3(2)  | 176.32(11) |            |
| O3-Mn2-N5   | 90.8(5)  | 90.7(3)  | 89.5(2)   | 88.22(11)  |            |
| O3-Mn2-N6   | 83.8(5)  | 84.5(2)  | 94.4(2)   | 94.04(11)  |            |
| O3-Mn2-N7   | 92.6(5)  | 92.8(3)  | 84.6(2)   | 85.60(11)  |            |
| O3-Mn2-N8   | 90.6(5)  | 89.8(2)  | 90.4(2)   | 89.76(11)  |            |
| O4-Mn2-N5   | 88.6(5)  | 88.5(3)  | 94.0(2)   | 93.11(11)  |            |
| O4-Mn2-N6   | 91.1(5)  | 91.3(2)  | 87.2(2)   | 89.53(11)  |            |
| O4-Mn2-N7   | 87.4(4)  | 87.5(2)  | 92.2(2)   | 94.19(11)  |            |
| O4-Mn2-N8   | 94.6(5)  | 94.4(2)  | 87.5(2)   | 86.56(11)  |            |
| N5-Mn2-N6   | 89.3(5)  | 88.9(3)  | 84.0(2)   | 82.83(11)  |            |
| N5-Mn2-N7   | 172.6(5) | 172.7(3) | 164.9(2)  | 160.85(11) |            |
| N7-Mn2-N6   | 100.1(5) | 100.4(3) | 82.5(2)   | 79.55(11)  |            |
| N8-Mn2-N5   | 84.6(5)  | 85.0(3)  | 105.9(2)  | 111.04(11) |            |
| N8-Mn2-N6   | 169.1(5) | 169.2(3) | 169.0(2)  | 165.75(11) |            |
| N8-Mn2-N7   | 86.4(5)  | 86.1(3)  | 88.1(2)   | 87.07(11)  |            |
| O5-Mn3-O6   |          |          | 176.1(2)  |            |            |
| O5-Mn3-N9   |          |          | 88.0(2)   |            |            |
| O5-Mn3-N10  |          |          | 94.35(19) |            |            |
| O5-Mn3-N11  |          |          | 85.09(19) |            |            |
| O5-Mn3-N12  |          |          | 89.8(2)   |            |            |
| O6-Mn3-N9   |          |          | 92.79(19) |            |            |
| O6-Mn3-N10  |          |          | 89.57(19) |            |            |
| O6-Mn3-N11  |          |          | 95.4(2)   |            |            |
| O6-Mn3-N12  |          |          | 86.3(2)   |            |            |
| N9-Mn3-N10  |          |          | 82.3(2)   |            |            |
| N9-Mn3-N11  |          |          | 159.5(2)  |            |            |
| N11-Mn3-N10 |          |          | 79.0(2)   |            |            |
| N12-Mn3-N9  |          |          | 111.9(2)  |            |            |
| N12-Mn3-N10 |          |          | 165.3(2)  |            |            |
| N12-Mn3-N11 |          |          | 87.3(2)   |            |            |
| O7-Mn4-O8   |          |          | 176.8(2)  |            |            |
| O7-Mn4-N13  |          |          | 87.8(2)   |            |            |
| O7-Mn4-N14  |          |          | 95.0(2)   |            |            |
| O7-Mn4-N15  |          |          | 84.9(2)   |            |            |
| O7-Mn4-N16  |          |          | 90.6(2)   |            |            |
| O8-Mn4-N13  |          |          | 93.3(2)   |            |            |
| O8-Mn4-N14  |          |          | 88.2(2)   |            |            |
| O8-Mn4-N15  |          |          | 95.1(2)   |            |            |
| O8-Mn4-N16  |          |          | 86.2(2)   |            |            |
| N13-Mn4-N14 |          |          | 81.9(3)   |            |            |

|             |          |
|-------------|----------|
| N13-Mn4-N15 | 158.6(2) |
| N15-Mn4-N14 | 78.7(3)  |
| N16-Mn4-N13 | 114.3(2) |
| N16-Mn4-N14 | 163.1(2) |
| N16-Mn4-N15 | 86.0(2)  |

---



S2.2 Crystal structure and packing of complex 1

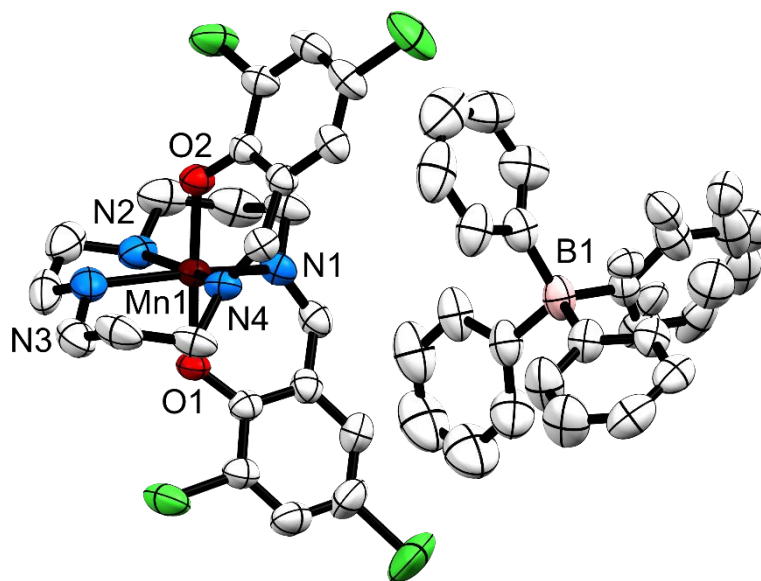

**Figure S3** Asymmetric unit of complex 1,  $[\text{Mn}(\text{3,5-Cl-sal}_2(323))]\text{BPh}_4$  measured at 250 K shown with 50 % atomic probability distributions for ellipsoids with hydrogen atoms omitted for clarity.

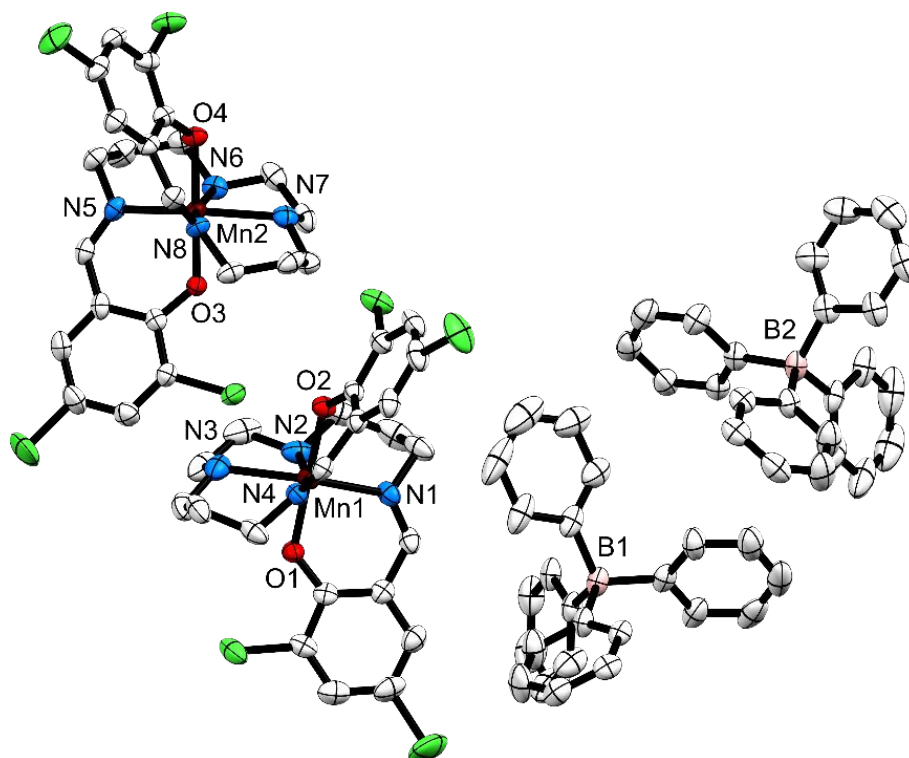

**Figure S4** Asymmetric unit of complex 1,  $[\text{Mn}(\text{3,5-Cl-sal}_2(323))]\text{BPh}_4$  measured at 150 K shown with 50 % atomic probability distributions for ellipsoids with hydrogen atoms omitted for clarity.

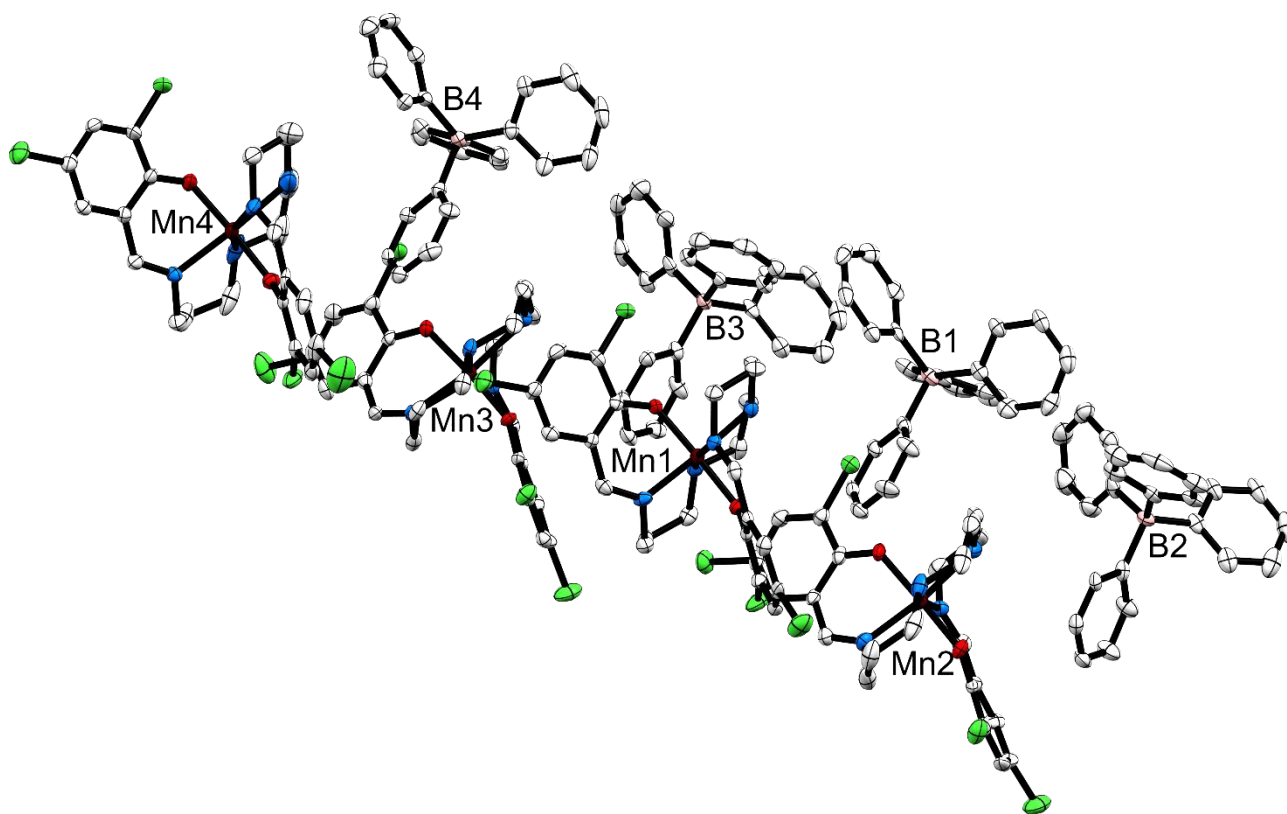

**Figure S5** Asymmetric unit of complex **1**,  $[\text{Mn}(\text{3,5-diCl-sal})_2\text{323}]\text{BPh}_4$  measured at 115 K shown with 50 % atomic probability distributions for ellipsoids with hydrogen atoms omitted for clarity.

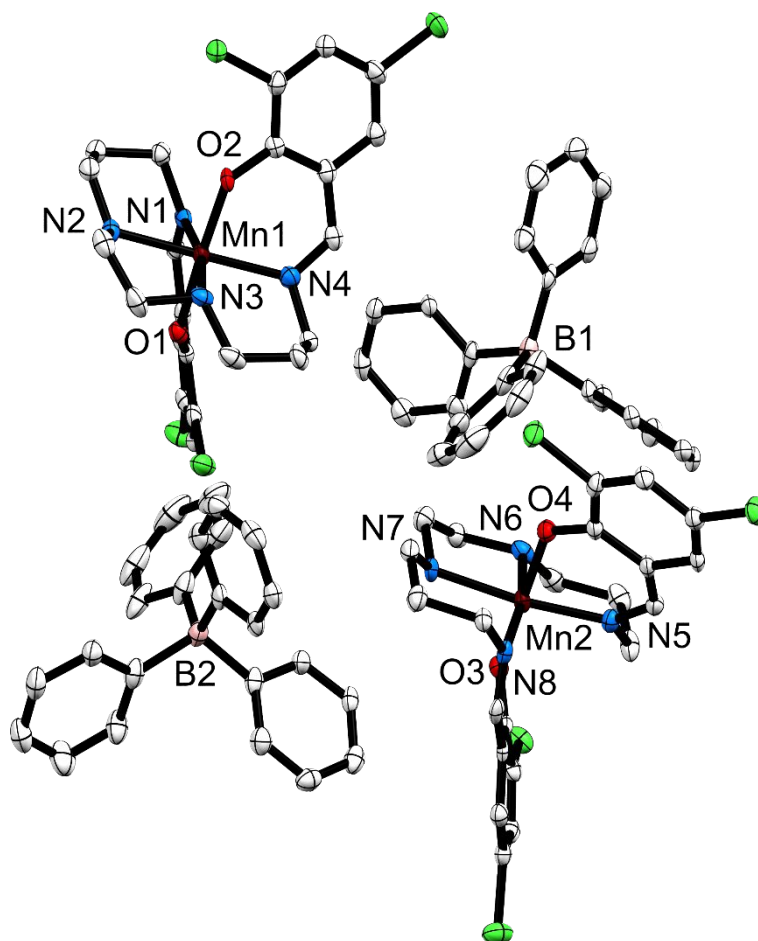

**Figure S6** Asymmetric unit of complex **1**,  $[\text{Mn}(\text{3,5-Cl-sal}_2(323))]\text{BPh}_4$  measured at 82 K shown with 50 % atomic probability distributions for ellipsoids with hydrogen atoms omitted for clarity.

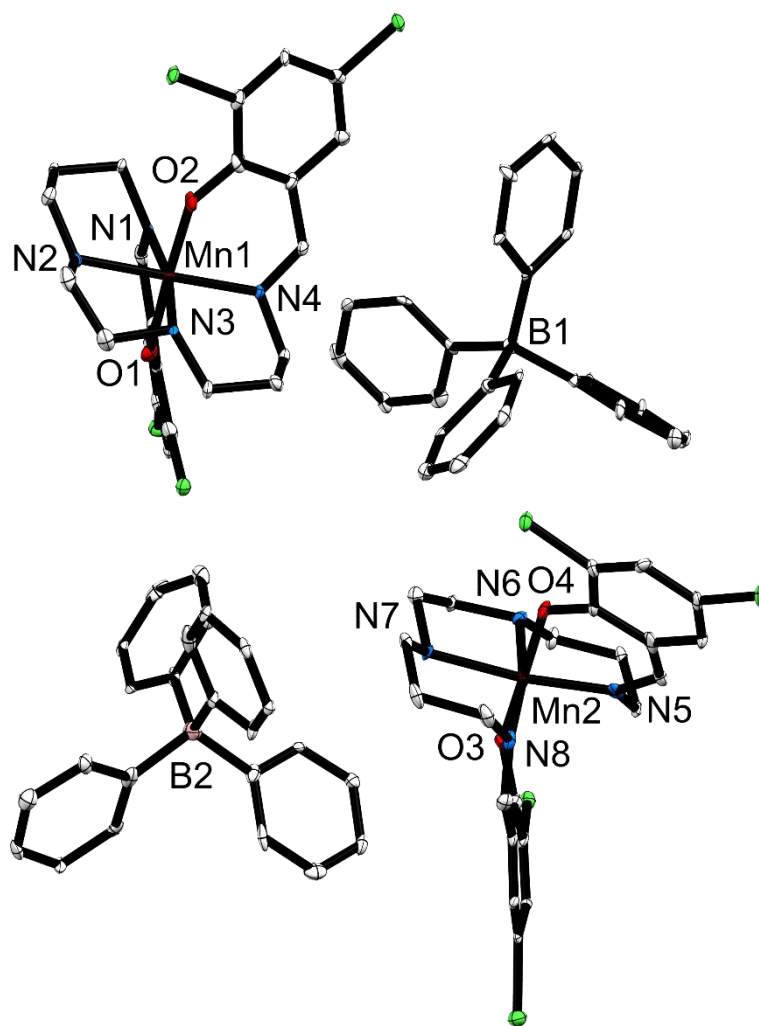

**Figure S7** Asymmetric unit of complex **1**,  $[\text{Mn}(3,5\text{-Cl-sal}_2(323))]\text{BPh}_4$  measured at 10 K shown with 50 % atomic probability distributions for ellipsoids with hydrogen atoms omitted for clarity.

Complex **1** is refined in the non-centrosymmetric polar space group  $Cc$  at 250 K. At 150 K, complex **1** is refined in the non-centrosymmetric polar space group  $Pc$  and at 115 K, 82 K and 10 K in the non-centrosymmetric chiral and polar space group  $P1$ . Complex **1** comprises the  $[\text{Mn}(3,5\text{-diCl-sal}_2(323))]^+$  cation and the tetraphenylborate counteranion,  $\text{BPh}_4^-$ . Each unit cell in the HT, INT2 and INT1 phases contains four  $\text{Mn}^{3+}$  cations and four  $\text{BPh}_4^-$  anions. Hence, the  $Cc$  structures have  $Z = 4$  and  $Z' = 1$ , the  $Pc$  structure has  $Z = 4$  and  $Z' = 2$  and the  $P1$  structure has  $Z = 4$  and  $Z' = 4$ . The LT  $P1$  structure contains two  $\text{Mn}^{3+}$  cations and two  $\text{BPh}_4^-$  anions in the unit cell which results in  $Z = 2$  and  $Z' = 2$ . The structures are all polar (with the  $P1$  structure also being chiral) with Flack parameters<sup>[9]</sup> of each structure being close to zero. No solvent molecules were located in any of the structures.

## S2.3 Hirshfeld surface mapping

The Hirshfeld surfaces are mapped with  $d_{\text{norm}}$ , and 2D fingerprint plots were generated using CrystalExplorer 17.5.<sup>1</sup> The graphical plot uses a red-white-blue colour scheme for the molecular Hirshfeld surfaces. The red highlights on the Hirshfeld surfaces show contacts shorter than the van der Waals distance, contacts within the van der Waals distance are shown in white and longer contacts are shown in blue.

a) Hirshfeld surface mapped with  $d_{\text{norm}}$  viewed along:

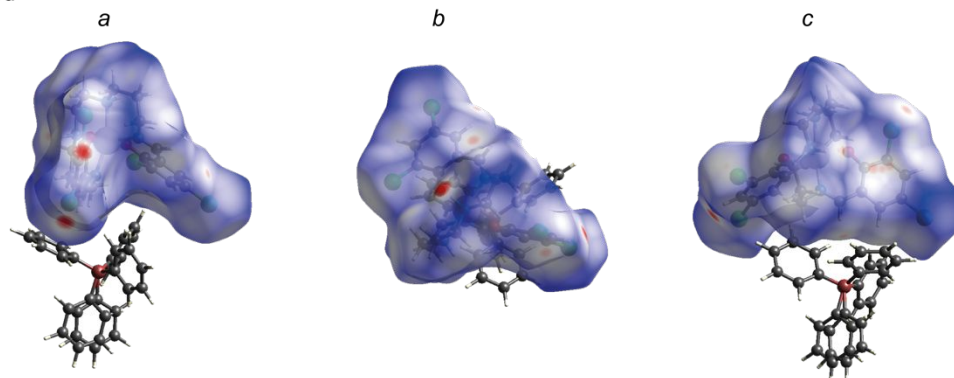

b) Fingerprint plots of contacts of 1:

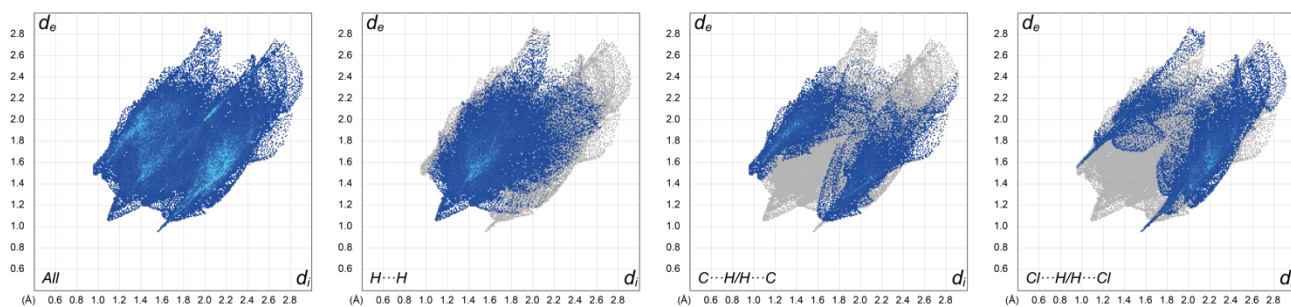

**Figure S8** a) Hirshfeld surface mapped with  $d_{\text{norm}}$  for the structure of complex **1** measured at 250 K viewed along the *a*, *b* and *c* direction, b) fingerprint plots with all intermolecular interactions resolved into the contribution of H...Cl/Cl...H, H...C/C...H and H...H/H...H contacts of complex **1** at 250 K.

a) Hirshfeld surface mapped with  $d_{norm}$  viewed along:

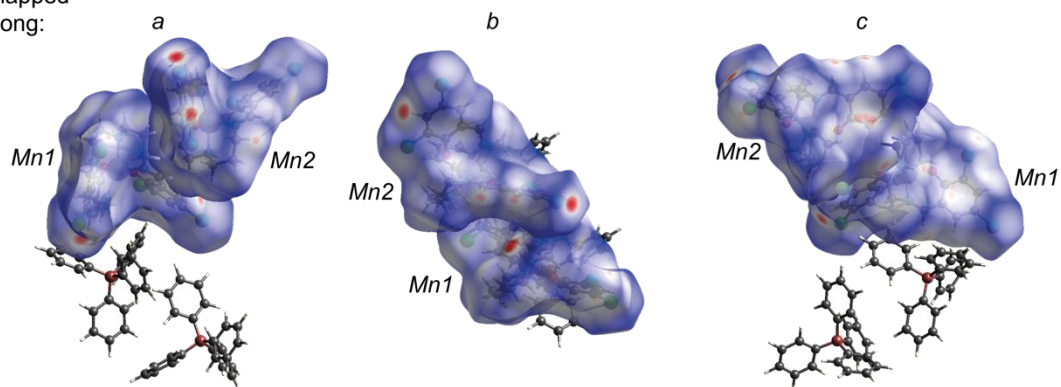

b) Fingerprint plots of contacts of 1:

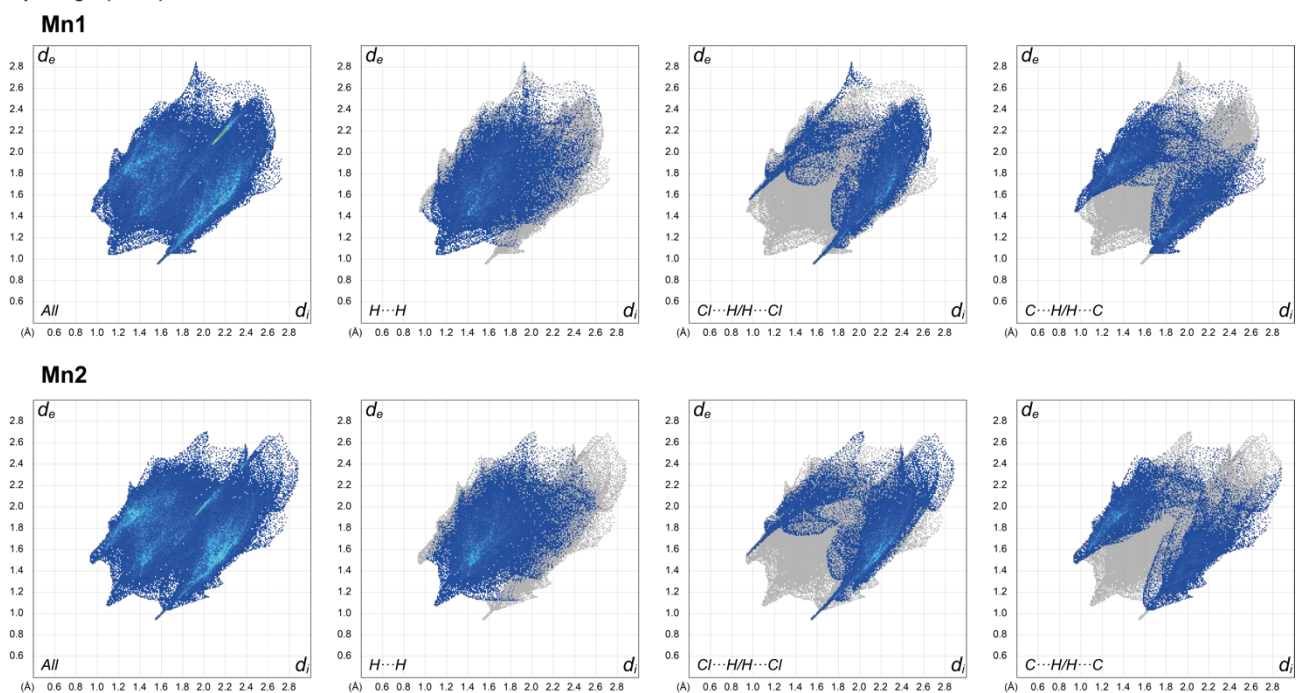

**Figure S9** a) Hirshfeld surface mapped with  $d_{norm}$  for the structure of complex **1** measured at 150 K viewed along the  $a$ ,  $b$  and  $c$  direction, b) fingerprint plots with all intermolecular interactions resolved into the contribution of  $H\cdots Cl/Cl\cdots H$ ,  $H\cdots C/C\cdots H$  and  $H\cdots H/H\cdots H$  contacts of complex **1** at 150 K.



a) Hirshfeld surface mapped with  $d_{norm}$  viewed along:

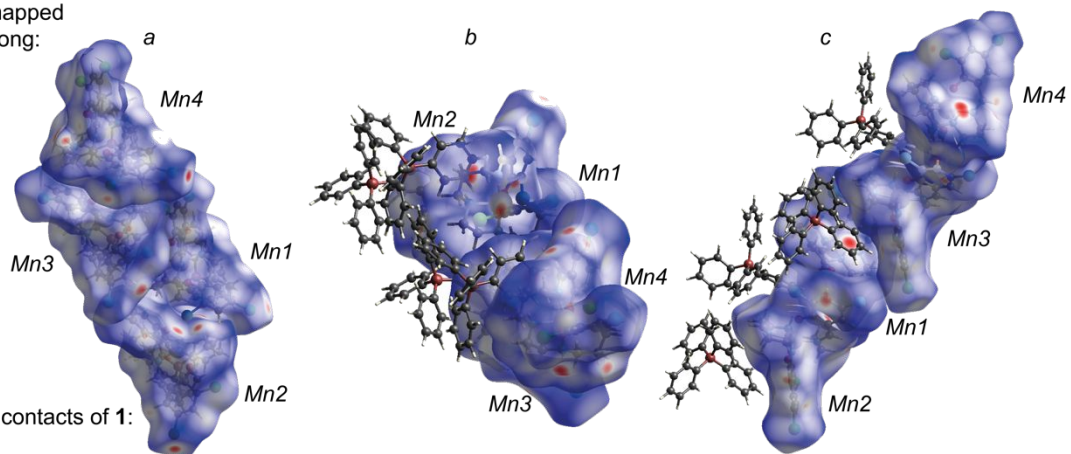

b) Fingerprint plots of contacts of 1:

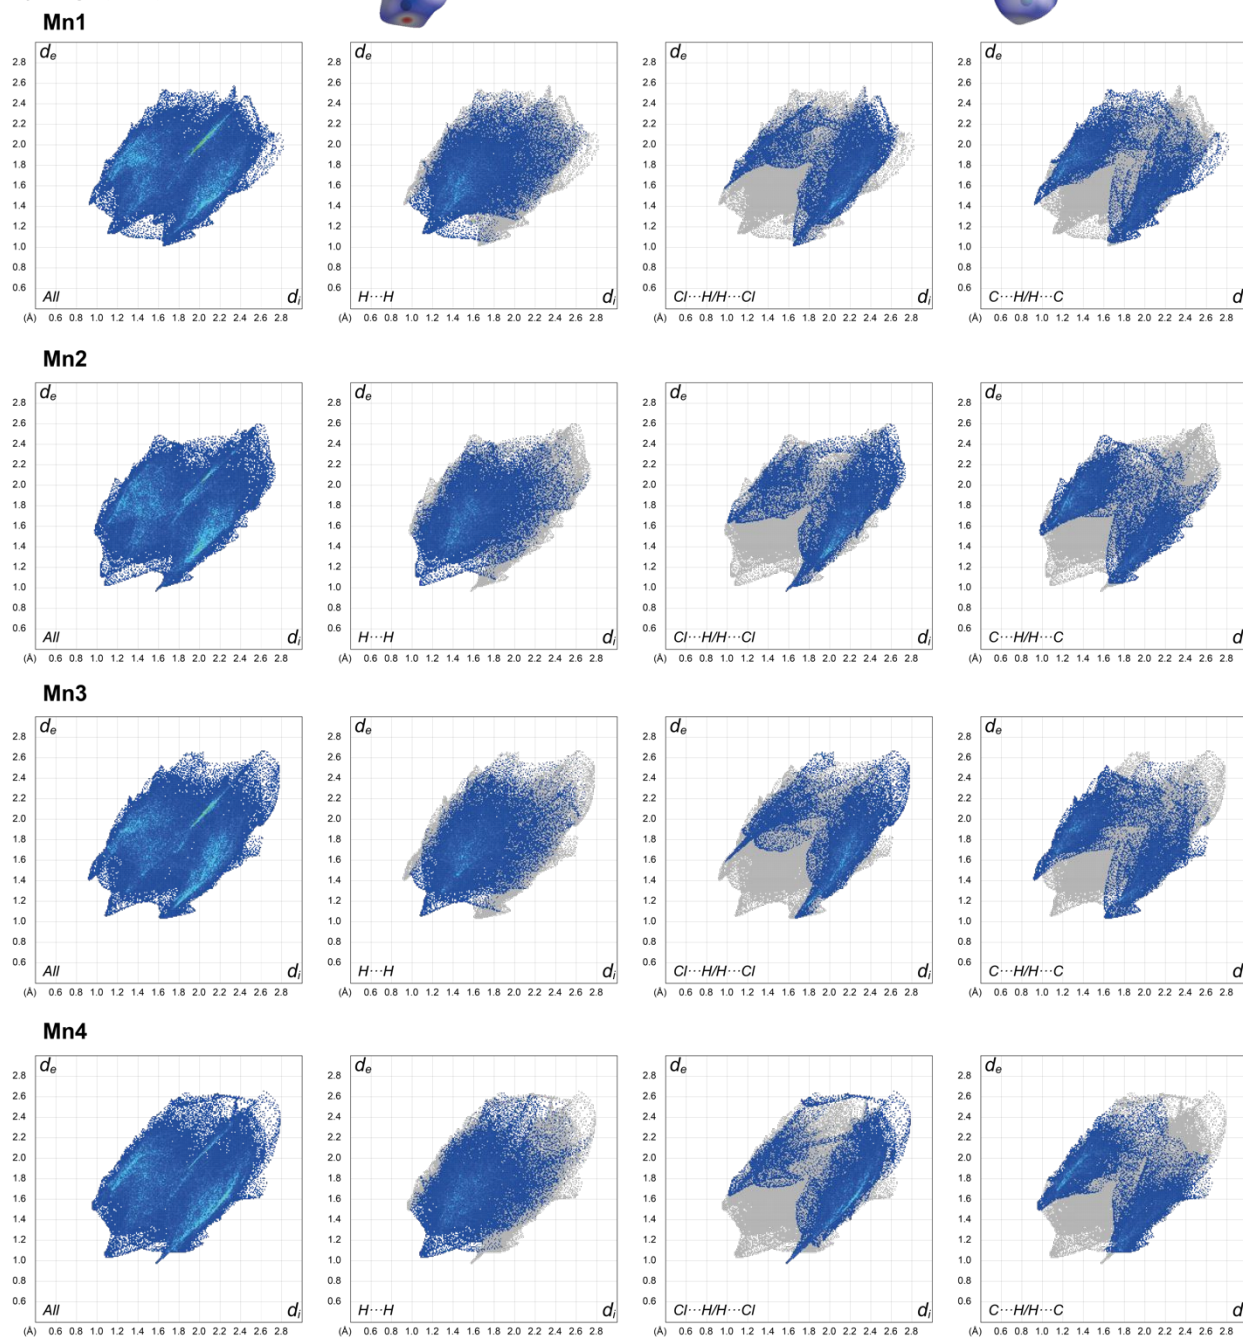

**Figure S10** a) Hirshfeld surface mapped with  $d_{norm}$  for the structure of complex **1** measured at 115 K viewed along the  $a$ ,  $b$  and  $c$  direction, b) fingerprint plots with all intermolecular interactions resolved into the contribution of  $H\cdots Cl/Cl\cdots H$ ,  $H\cdots C/C\cdots H$  and  $H\cdots H/H\cdots H$  contacts of complex **1** at 115 K.

a) Hirshfeld surface mapped with  $d_{norm}$  viewed along:

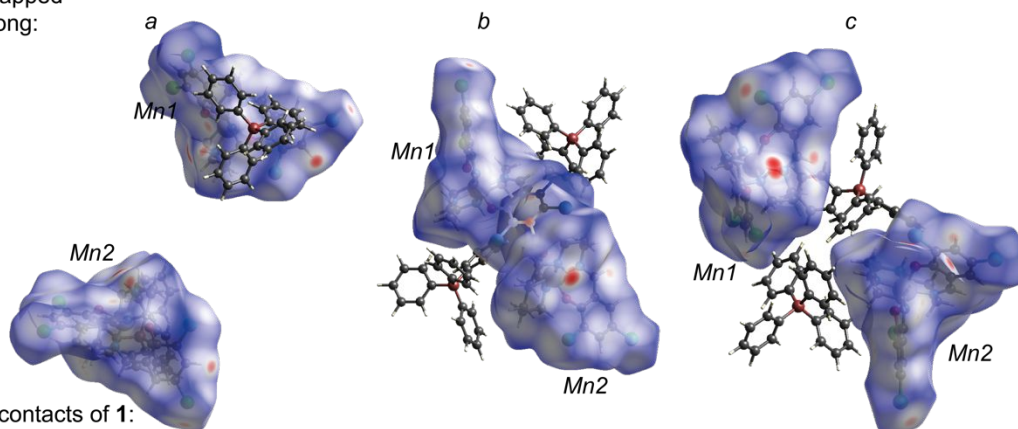

b) Fingerprint plots of contacts of **1**:

**Mn1**

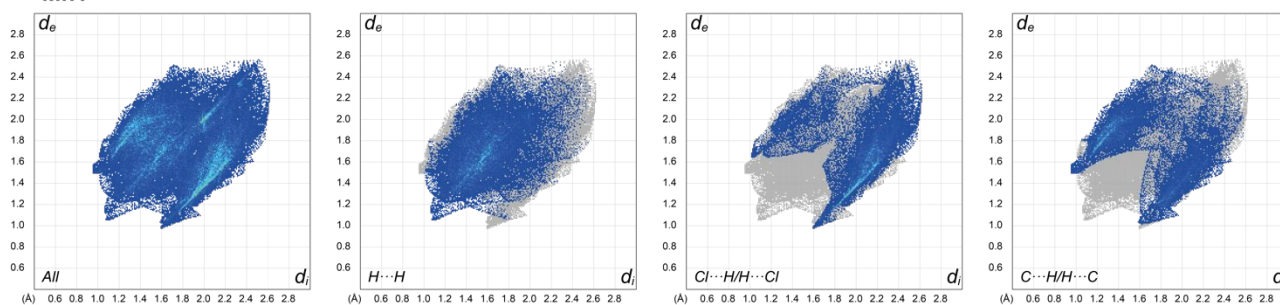

**Mn2**

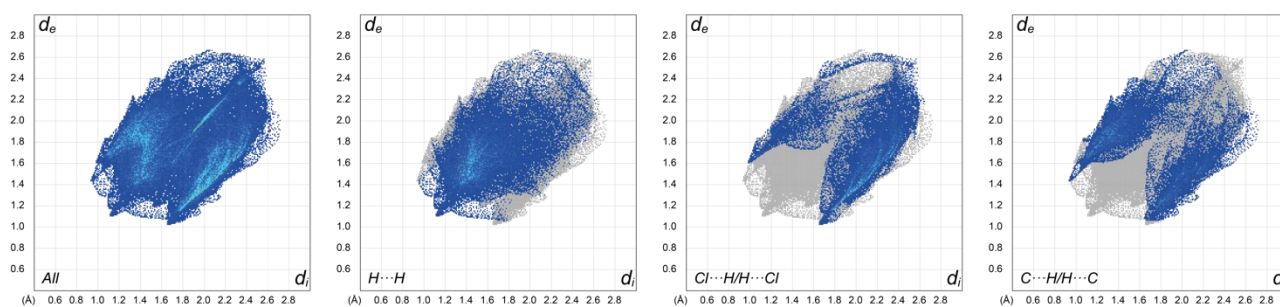

**Figure S11** a) Hirshfeld surface mapped with  $d_{norm}$  for the structure of complex **1** measured at 82 K viewed along the *a*, *b* and *c* direction, b) fingerprint plots with all intermolecular interactions resolved into the contribution of H...Cl/Cl...H, H...C/C...H and H...H/H...H contacts of complex **1** at 82 K.

a) Hirshfeld surface mapped with  $d_{norm}$  viewed along:

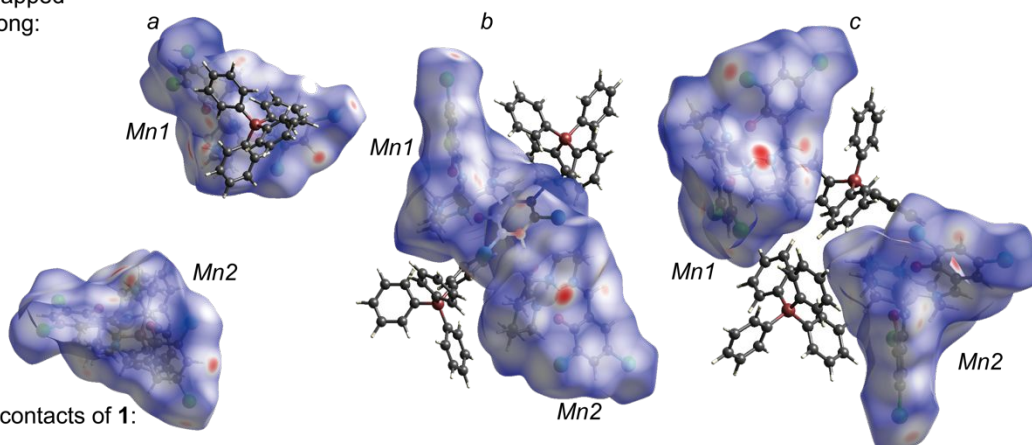

b) Fingerprint plots of contacts of 1:

**Mn1**

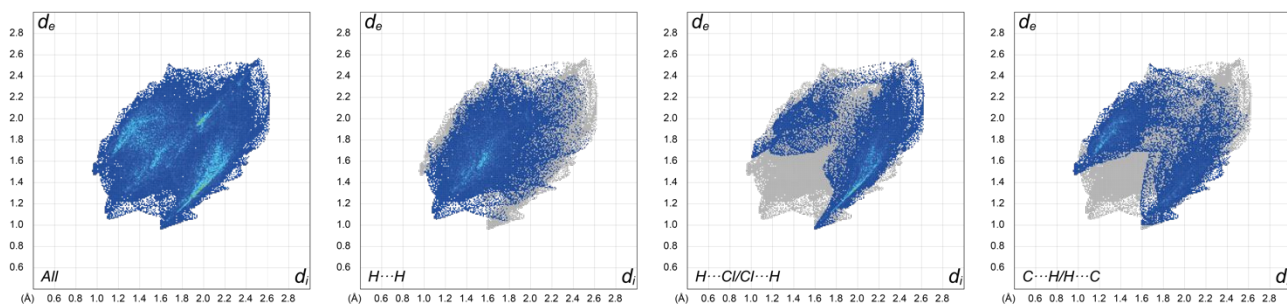

**Mn2**

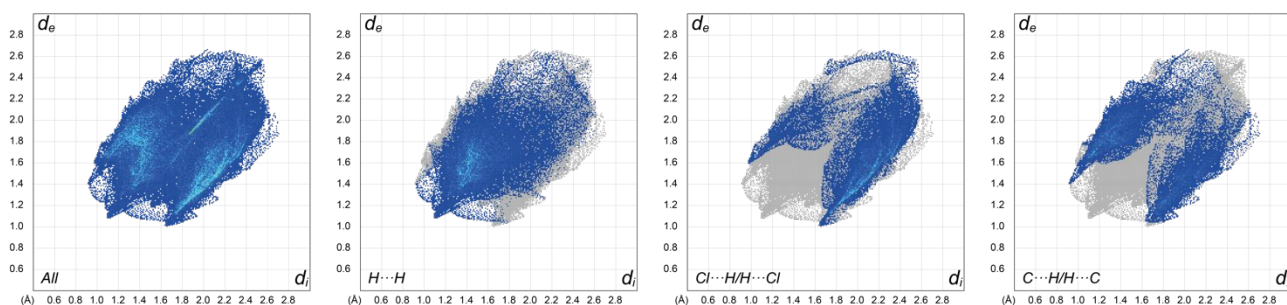

**Figure S12** a) Hirshfeld surface mapped with  $d_{norm}$  for the structure of complex 1 measured at 10 K viewed along the  $a$ ,  $b$  and  $c$  direction, b) fingerprint plots with all intermolecular interactions resolved into the contribution of H...Cl/Cl...H, H...C/C...H and H...H/H...H contacts of complex 1 at 10 K.



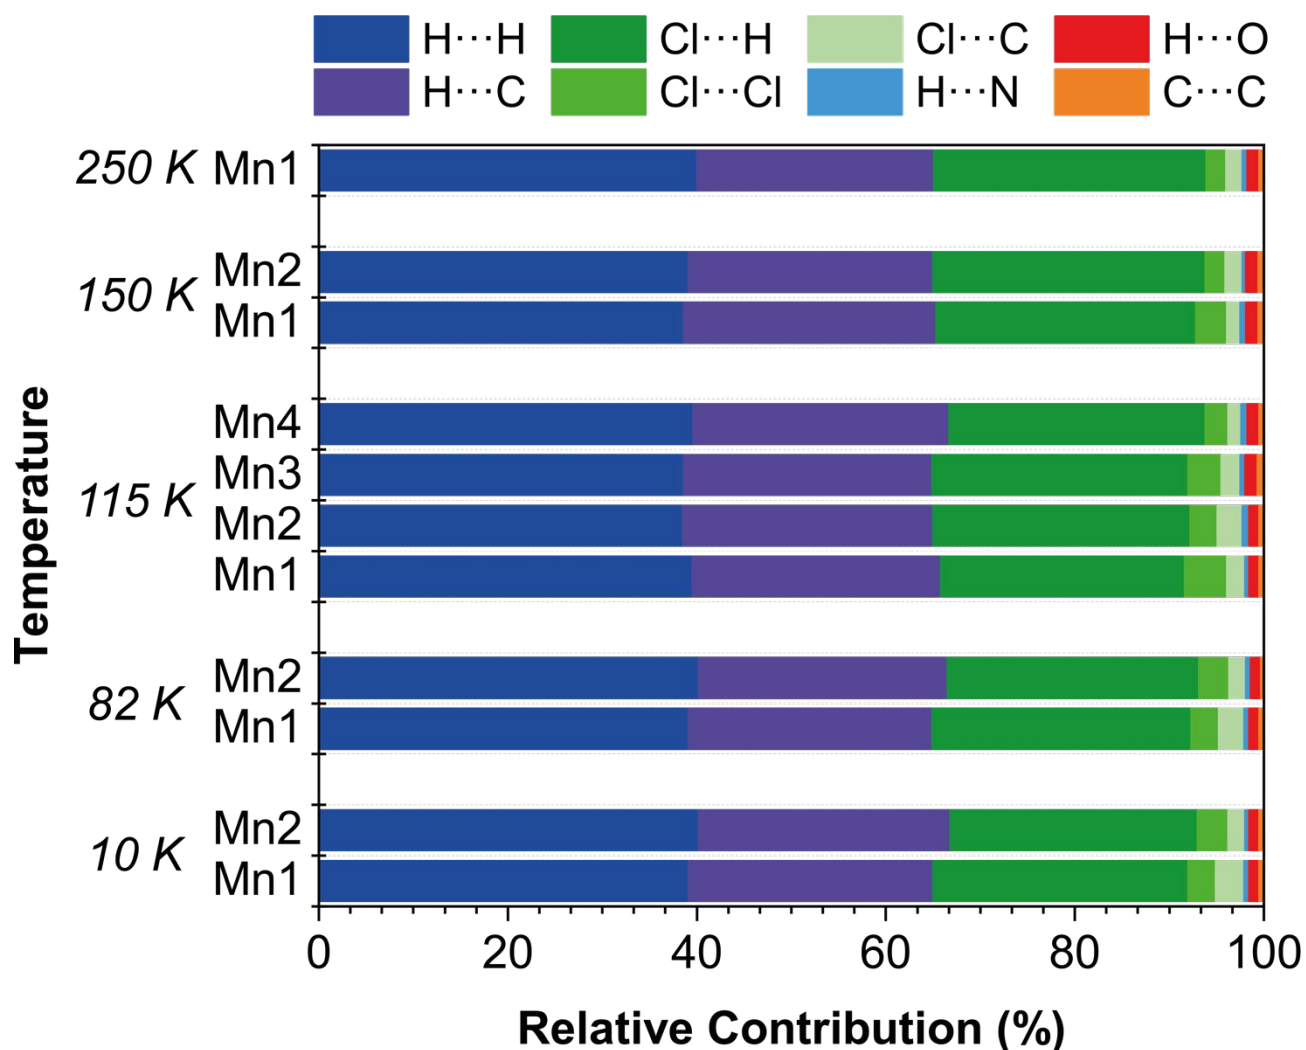

**Figure S13** Relative contributions to the Hirshfeld surface area of different intermolecular interactions for the structures at 10, 82, 115, 150 and 250 K.

The dominating interactions originate from H...C, H...Cl, and H...H between the hydrogen atoms on the tetraphenylborate anion and the chloride groups on the phenyl ring on the salicylaldehyde motif as well as the hydrogen and carbon atoms in the backbone of the Mn<sup>3+</sup> chelated complex **1**. Those interactions appear as distinct spikes in the 2D fingerprint plot.

## S2.4 Variable temperature single crystal X-ray diffraction

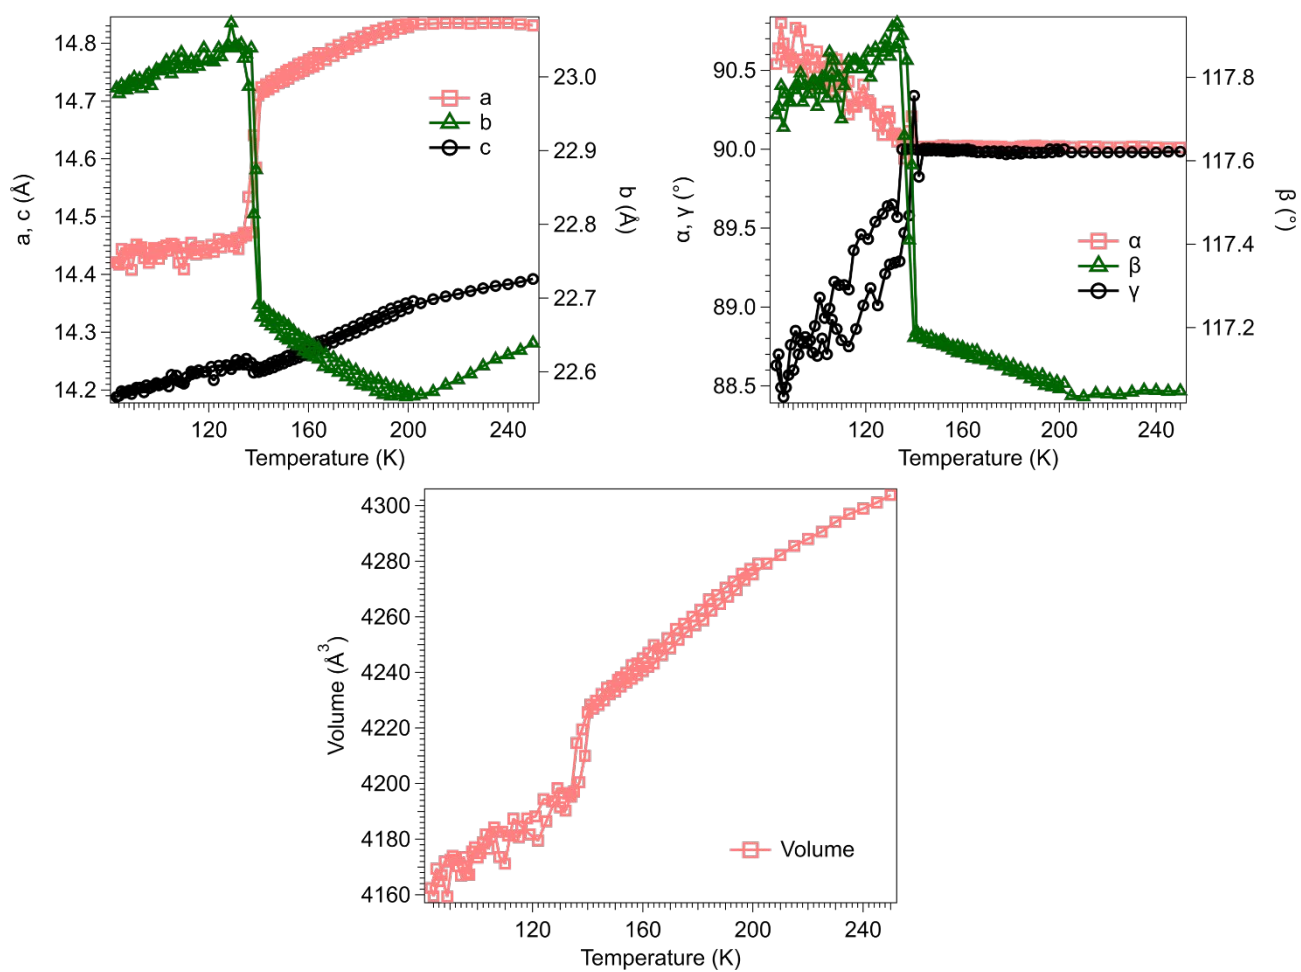

**Figure S14** Variable temperature X-ray diffraction of changes in unit cell parameters,  $V$ ,  $a$ ,  $b$ ,  $c$ ,  $\alpha$ ,  $\beta$  and  $\gamma$ , measured on a single crystal of complex **1** showing the cooling and warming dependence between 250 K  $\rightarrow$  83 K  $\rightarrow$  200 K. The data was integrated with respect to the HT  $Cc$  cell at 250 K.

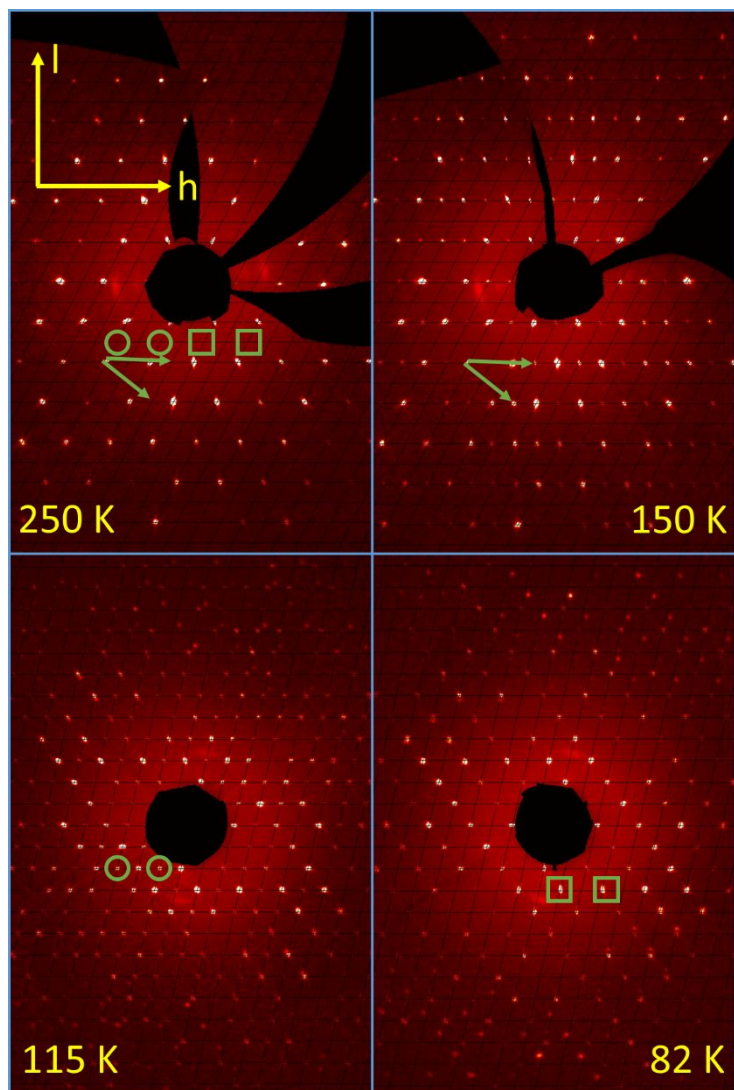

**Figure S15** Representative precession images ( $h0l$ ) plane obtained from variable temperature single crystal X-ray diffraction of the unit cell parameters collected on a single crystal of complex **1** at 250, 150 K, 115 K and 82 K.

### S3 Resonant ultrasound spectroscopy

#### S3.1 Strain analysis from unit cell parameters

Spontaneous strains associated with the three structural phase transitions observed in complex **1** have been determined using the approach and equations as previously set out.<sup>2</sup> The parent structure has space group *Cc* and the three derivative structures have space groups *Pc*, *P1* and *P1*<sub>(1/2)</sub> respectively. The group-subgroup sequences are as follows: *Cc* → *Pc* (co-elastic), *Cc* → *P1* (improper ferroelastic) and *Cc* → *P1*<sub>(1/2)</sub> (pseudoproper ferroelastic). Values of reference parameters  $a_o$ ,  $b_o$ ,  $c_o$ ,  $\alpha_o$  (=90°),  $\beta_o^*$  (= 180 -  $\beta_o$ ),  $\gamma_o$  (=90°) for the *Cc* structure were obtained by extrapolation of a linear fit to measured parameters in the temperature interval 250 K to 208 K, Figure S16. A linear extrapolation does not allow for the requirement that the slope of lattice parameters of crystalline materials must tend to zero as  $T \rightarrow 0$ , but there is insufficient data for the *Cc* structure to allow fitting with a coth function as would normally be used for analysis of strains at low temperatures.<sup>3-4</sup>

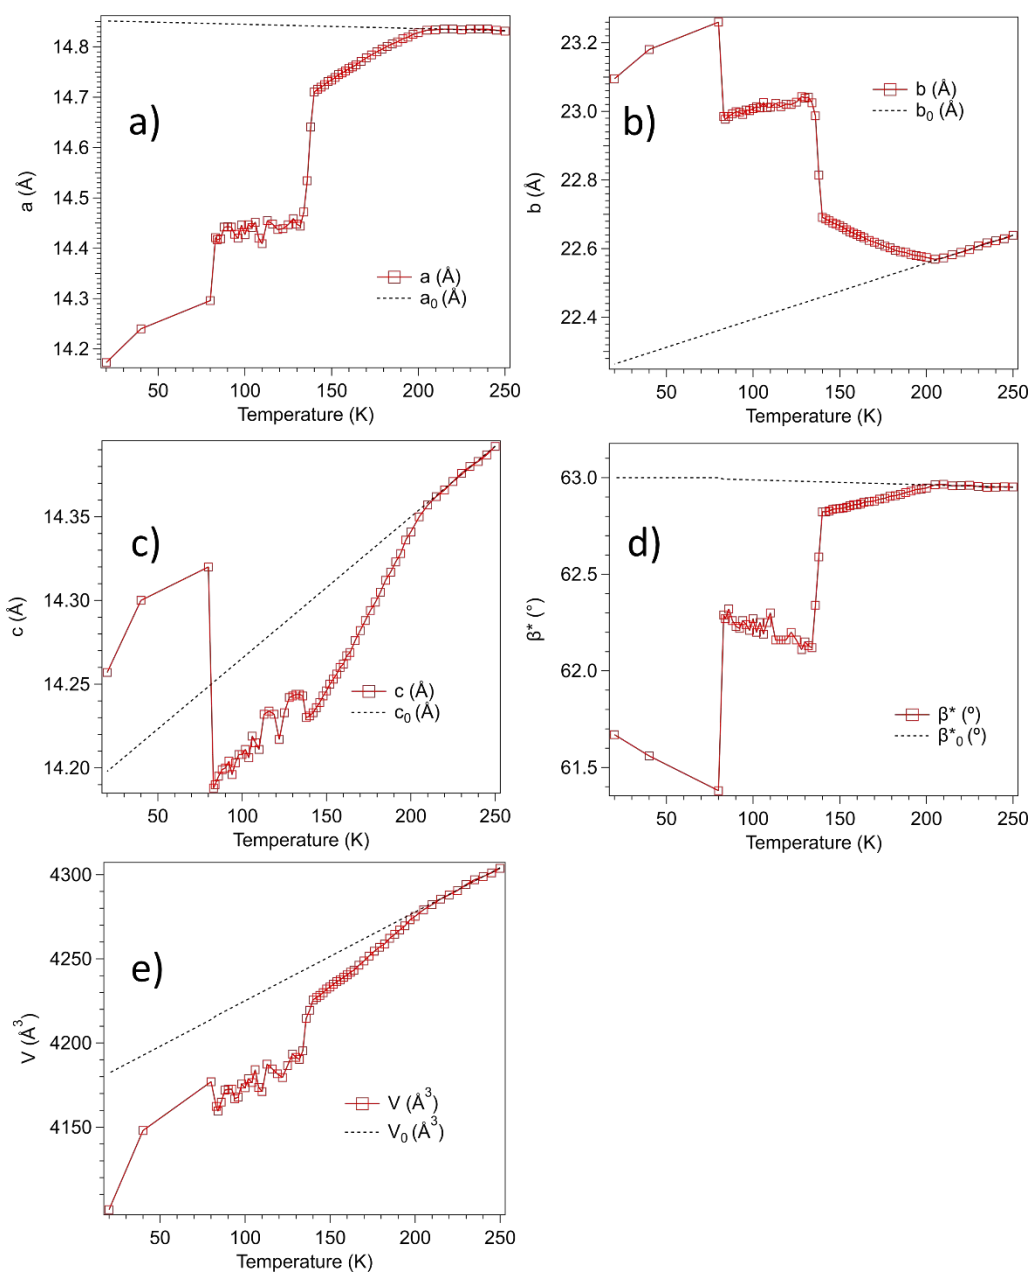

**Figure S16** Linear fits to lattice parameter data in the temperature interval 250 K to 83 K. The extrapolations to lower temperatures (dotted lines) represent variations of reference parameters  $a_o$ ,  $b_o$ ,  $c_o$ ,  $\alpha_o$  ( $=90^\circ$ ),  $\beta_o$ ,  $\gamma_o$  ( $=90^\circ$ ) in calculations of the spontaneous strains associated with  $Cc \rightarrow Pc$ ,  $Cc \rightarrow P1$  and  $Cc \rightarrow P1_{(1/2)}$  transitions. Reference values of the unit cell volume,  $V_o$ , were obtained in the same way.

Individual strain components,  $e_i$ ,  $i = 1, 2, 3, 5$  were calculated for  $Cc \rightarrow Pc$  ( $e_4 = e_6 = 0$ ) according to the following equations:

$$e_1 = \frac{a - a_0}{a_0} \quad (S1)$$

$$e_2 = \frac{b - b_0}{b_0} \quad (S2)$$

$$e_3 = \frac{c \sin \beta - c_0 \sin \beta_0}{c_0 \sin \beta_0} \quad (S3)$$

$$e_5 = \left( \frac{c \cos \beta}{c_0 \sin \beta_0} - \frac{a \cos \beta_0}{a_0 \sin \beta_0} \right) \quad (S4)$$

Individual strain components,  $e_i$ ,  $i = 1-6$  were calculated for  $Cc \rightarrow P1$  and  $Cc \rightarrow P1_{(1/2)}$  according to the following equations:

$$e_1 = \frac{a}{a_0} \sin(\gamma) - 1 \quad (S5)$$

$$e_2 = \frac{b}{b_0} - 1 \quad (S6)$$

$$e_3 = \frac{c \sin(\alpha) \sin(\beta^*)}{c_0 \sin(\beta_0^*)} - 1 \quad (S7)$$

$$e_4 = \left( \frac{c \cos(\alpha)}{c_0 \sin(\beta_0^*)} + \frac{a \cos(\beta_0^*) \cos(\gamma)}{a_0 \sin(\beta_0^*)} \right) \quad (S8)$$

$$e_5 = \left( \frac{a \sin(\gamma) \cos(\beta_0^*)}{a_0 \sin(\beta_0^*)} + \frac{c \sin(\alpha) \cos(\beta^*)}{c_0 \sin(\beta_0^*)} \right) \quad (S9)$$

$$e_6 = \left( \frac{a}{a_0} \cos(\gamma) \right) \quad (S10)$$

Values of the volume strain,  $V_s$ , were given by the following equation:

$$V_s = \frac{V - V_0}{V_0} \quad (S11)$$

The resulting strain variations are given in Figures 5g,h of the main text. A test of the accuracy of linear extrapolations to obtain the reference parameters is provided by comparison of values for  $V_s$  obtained directly using Equation S11 with values obtained using  $V_s = e_1 + e_2 + e_3$ , which should be accurate for small volume strains. As shown in Figure 5g, the two variations of  $V_s$  have the same non-linear form of temperature dependence but with different absolute values. It is safe to conclude that the strain components all have a

continuous variation through the  $Cc \rightarrow Pc$  transition point and a non-linear dependence on temperature in the stability field of the  $Pc$  structure. Errors in the absolute values must increase with falling temperature however, because of the assumption of linearity for the reference parameters. The  $Pc \rightarrow P1$  transition is clearly discontinuous as expected, given that two space groups do not have a group-subgroup relationship. In principle it should be possible to determine the transition temperature for the  $Cc \rightarrow P1$  transition by extrapolation of a fit to  $e_4$  and  $e_6$  to zero, but there is insufficient data to produce a reliable result.

For each of the  $Cc \rightarrow Pc$  and  $Cc \rightarrow P1$  transitions, the lowest order terms for coupling between strains,  $e_i$ , and the driving order parameter,  $q$ , have the form  $\lambda e_i q^2$ . This leads to the expected relationships  $e_i \propto V_s \propto q^2$ . For the  $Cc \rightarrow P1_{(1/2)}$  transition, the lowest order terms for coupling between strains,  $e_i$ , and the driving order parameter,  $q$ , have the form  $\lambda e_i q$ . This leads to the expected relationships  $e_i \propto V_s \propto q$ .<sup>2</sup>

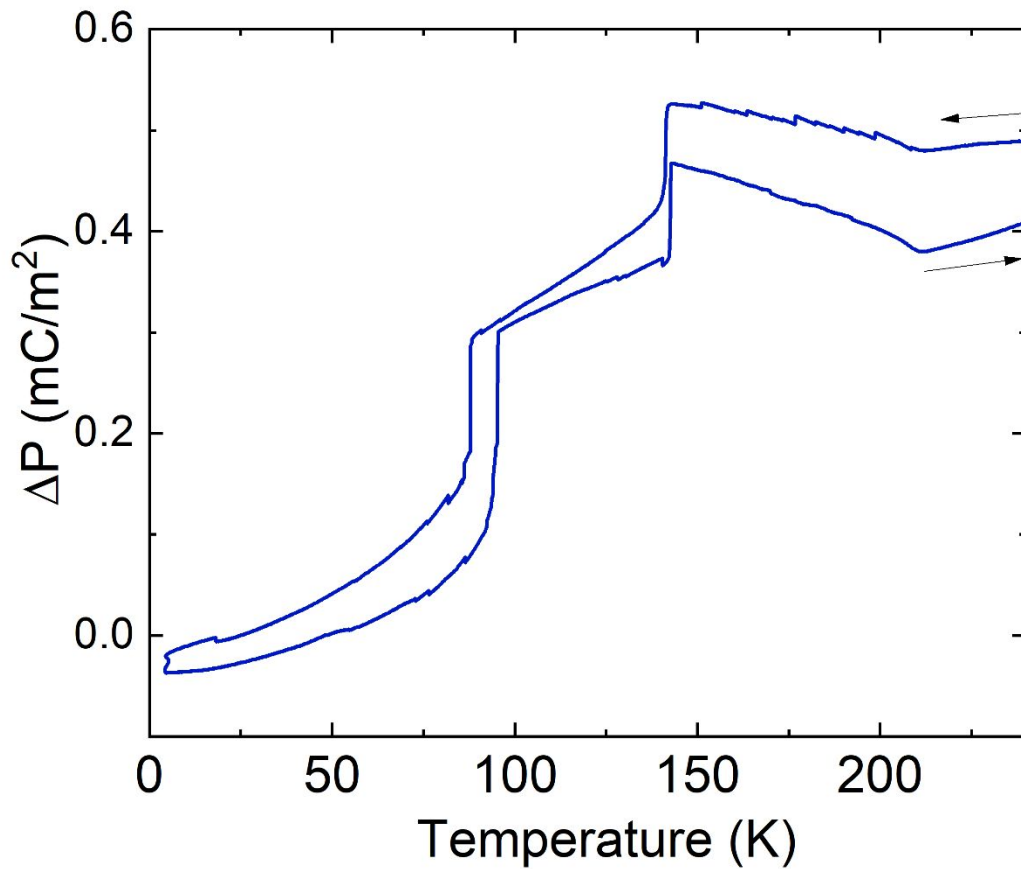

**Figure S17** Electric polarization change  $\Delta P$  measured vs temperature in zero externally applied electric and magnetic field for cooling and heating. The electric polarization shows sudden jumps at the LT→INT1 and INT1→INT2 transitions, consistent with the change in polar space group. A kink occurs at the INT2→HT transition. Small discontinuous jumps and irreversibility can be attributed to the interaction of the sample with the glue that adheres it to the measurement probe.



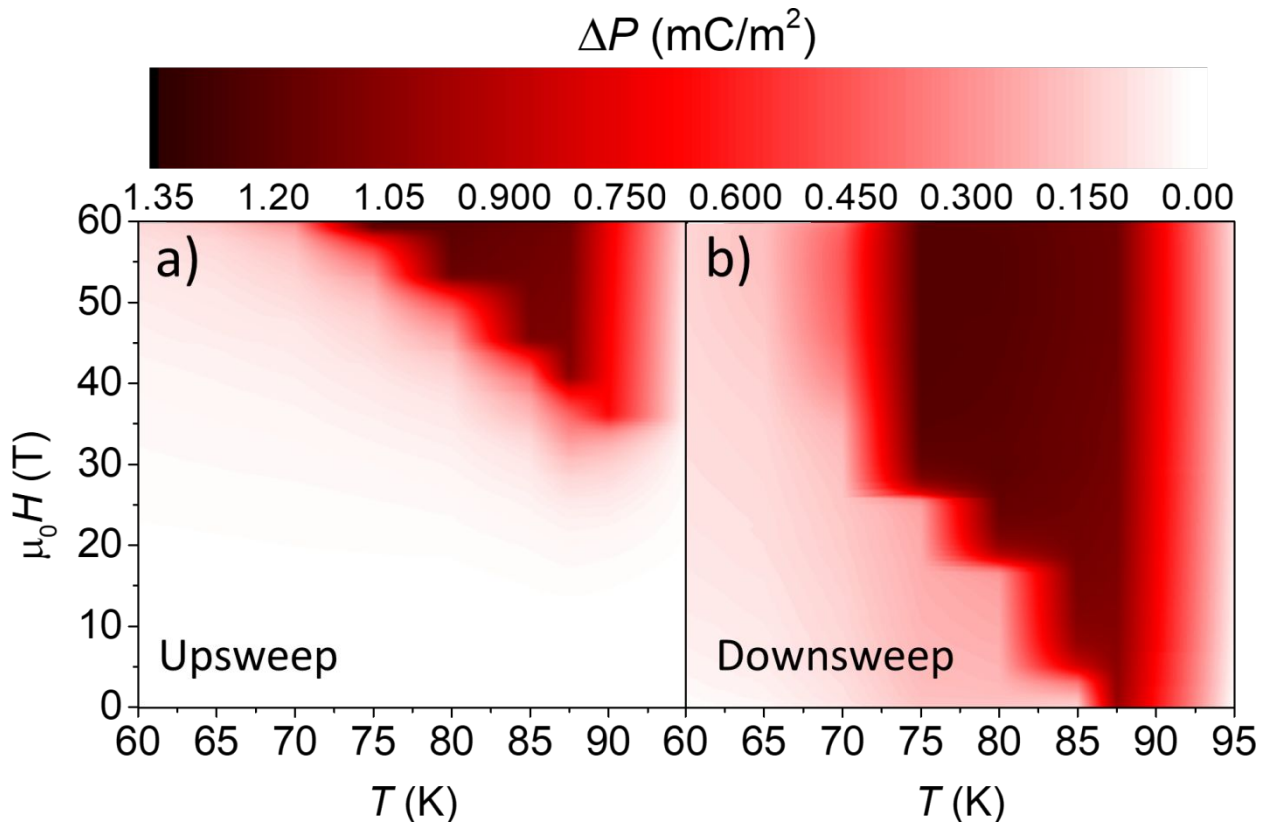

**Figure S18** Electric polarization  $\Delta P$  vs temperature  $T$  and magnetic field  $\mu_0 H$  in a colour plot, measured in millisecond pulsed fields for up and downsweeps of the field.

## S5 References

1. Turner, M. J.; McKinnon, J. J.; Wolff, S. K.; Grimwood, D. J.; Spackman, P. R.; Jayatilaka, D.; Spackman, M. A. *CrystalExplorer 17.5*, University of Western Australia: 2017.
2. Carpenter, M. A.; Salje, E. K. H.; Graeme-Barber, A., Spontaneous strain as a determinant of thermodynamic properties for phase transitions in minerals. *Eur. J. Mineral.* **1998**, *10* (4), 621-691.
3. Salje, E. K. H.; Wruck, B.; Thomas, H., Order-parameter saturation and low-temperature extension of Landau theory. *Z. Phys. B: Condens. Matter* **1991**, *82* (3), 399-404.
4. Carpenter, M. A.; Meyer, H.-W.; Sondergeld, P.; Marion, S.; Knight, K. S., Spontaneous strain variations through the low temperature phase transitions of deuterated lawsonite. *Am. Mineral.* **2003**, *88* (4), 534-546.
